# Supplementary material for: Terroir and vintage discrimination of Malbec wines based on phenolic composition across multiple sites in Mendoza, Argentina
Source: PubMed Central journal article supplement (PMC7859225; doi:10.1038/s41598-021-82306-0), 2021-02-03
Supplement: 41598_2021_82306_MOESM1_ESM.pdf [file 41598_2021_82306_MOESM1_ESM.pdf]

# Terroir and vintage discrimination of Malbec wines based on phenolic composition across multiple sites in Mendoza, Argentina

Roy Urvieta, Gregory Jones, Fernando Buscema, Rubén Bottini, Ariel Fontana

Supplementary information

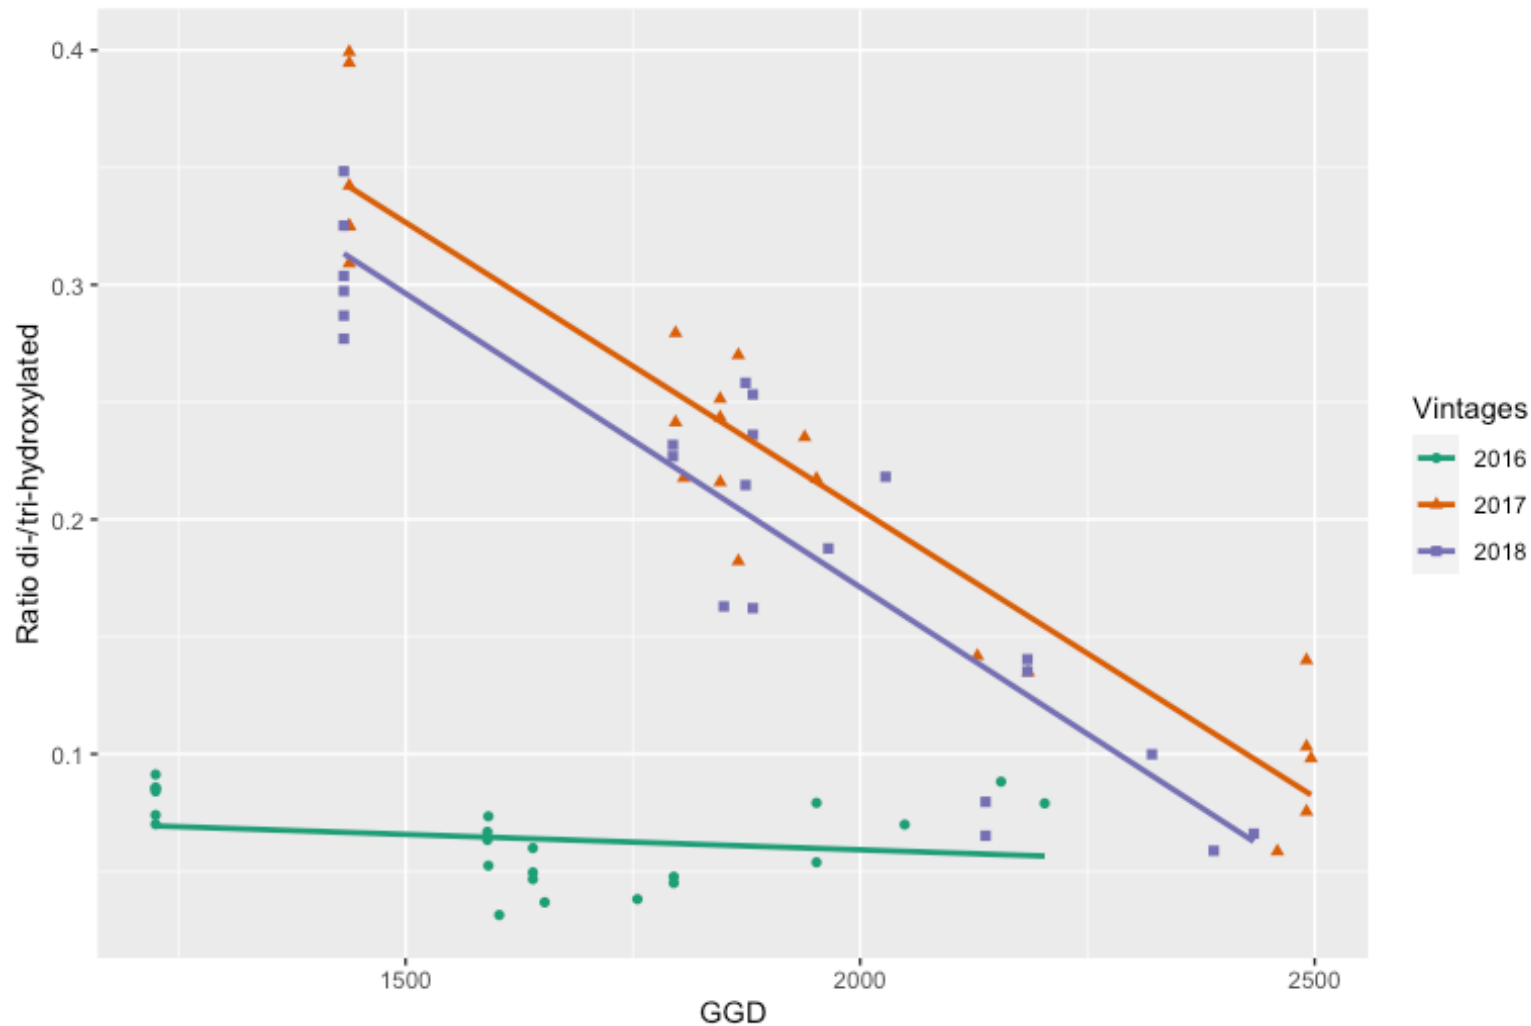

**Figure S1.** Relationship of GGD and ratio di-/tri-hydroxylated anthocyanins in three vintages. The images were created by PowerPoint and R-package emmeans - 'emmeans'

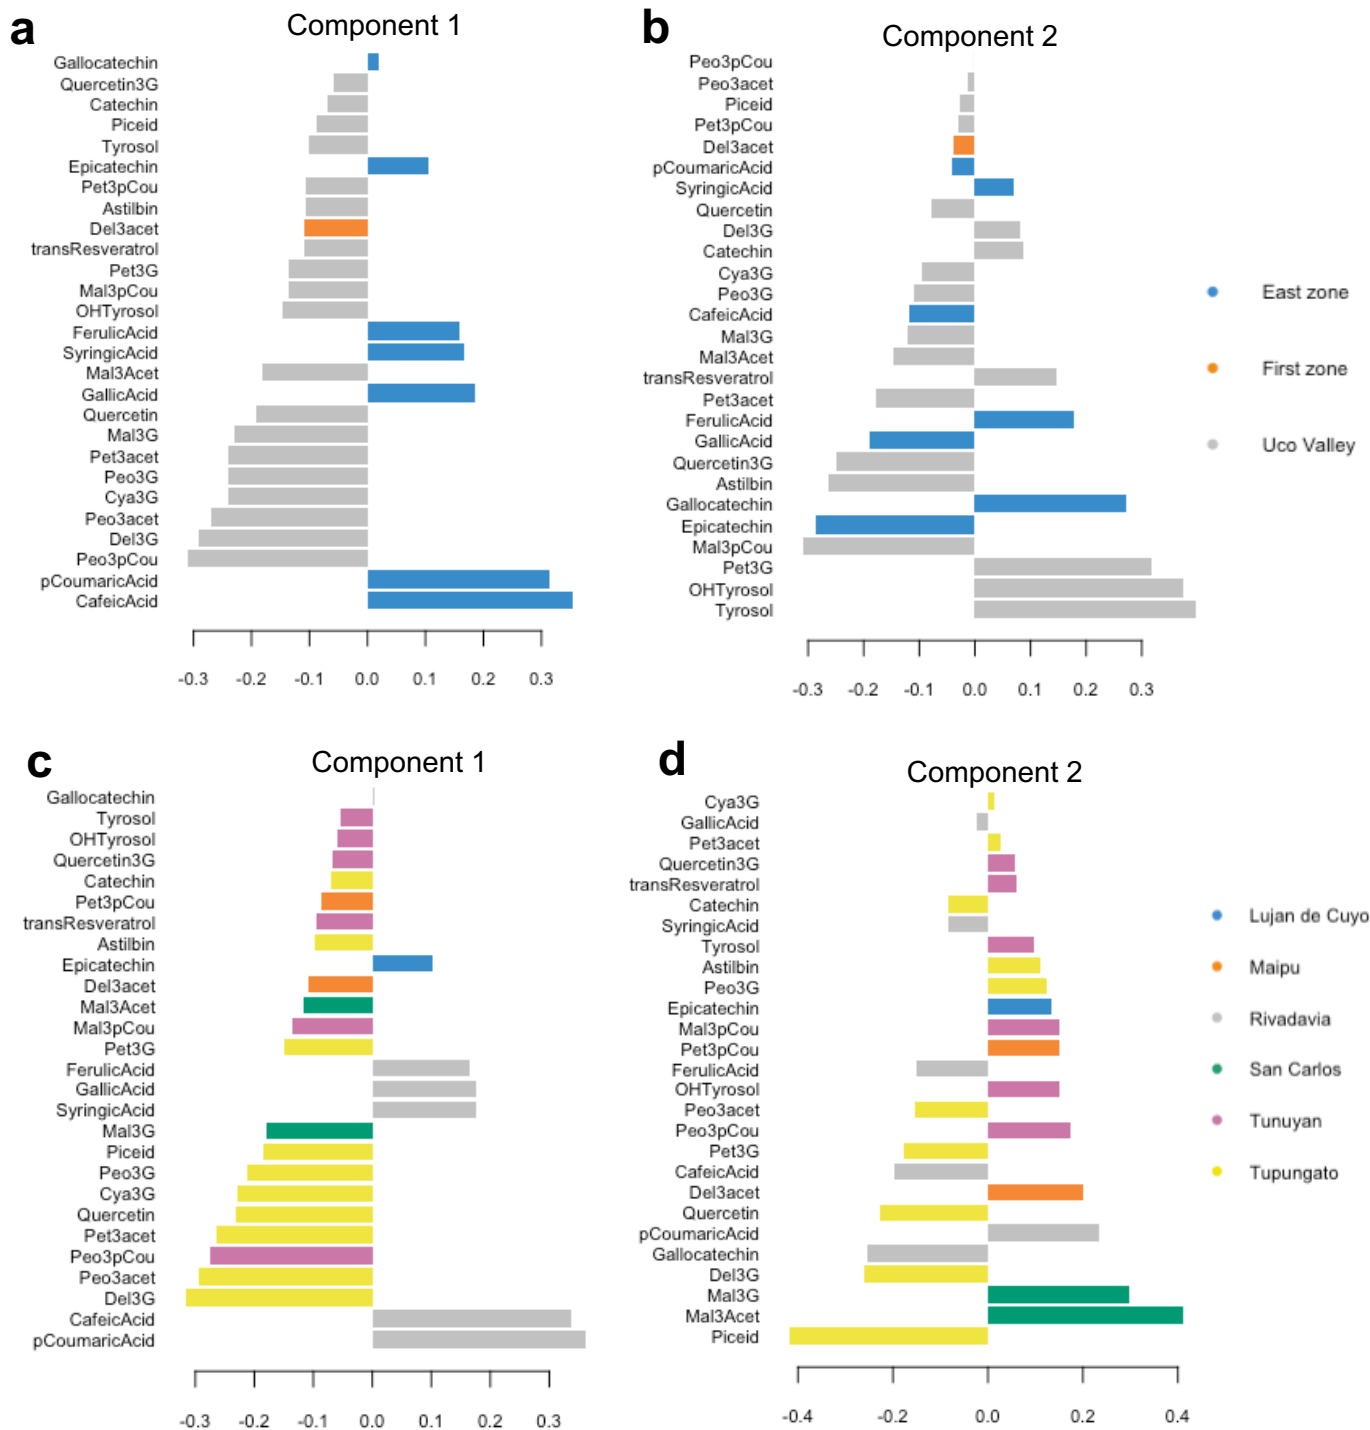

**Figure S2.** Loading plot of each feature selected on the first and second components of PLS-DA by Zones (a and b) and Departments (c and d), with color indicating the class with a maximal mean expression value for each PCs. The images were created by PowerPoint and R-package mixOmics - 'mixOmics'

**Table S1.** Overall data of anthocyanins and LMW-PCs (Name and PubChem CID) quantified [Mean (mg L<sup>-1</sup>) ± SD] in Malbec wines from different locations of Mendoza obtained in 2016 vintage.

| Location        | Anthocyanins                          |                                 |                                  |                                 |                                 |                                            |                                          |                                         |                                         |                                              |                                               |                                              |                   |
|-----------------|---------------------------------------|---------------------------------|----------------------------------|---------------------------------|---------------------------------|--------------------------------------------|------------------------------------------|-----------------------------------------|-----------------------------------------|----------------------------------------------|-----------------------------------------------|----------------------------------------------|-------------------|
|                 | Delphinidin 3-O-glucoside - 102515359 | Cyanidin 3-O-glucoside - 197081 | Petunidin 3-O-glucoside - 443651 | Peonidin 3-O-glucoside - 443654 | Malvidin 3-O-glucoside - 443652 | Delphinidin 3-O-acetylglucoside - 15385440 | Petunidin 3-O-acetylglucoside - 44256961 | Peonidin 3-O-acetylglucoside - 44256847 | Malvidin 3-O-acetylglucoside - 72193646 | Petunidin 3-O-p-coumaroylglucoside - 9897848 | Peonidin 3-O-p-coumaroylglucoside - 131752297 | Malvidin 3-O-p-coumaroylglucoside - 71308234 |                   |
| Parcels         | Luj-Agr-LP-1-80                       | 17.6 ± 4.7 ab                   | 2.0 ± 0.2 ab                     | 31.0 ± 22.9 cdefgh              | 6.6 ± 9.6 abc                   | 306.6 ± 122.6 cdefgh                       | 4.9 ± 0.8 abcd                           | 8.5 ± 6.1 defghi                        | 3.2 ± 2.5 bdefg                         | 32.6 ± 25.8 cdefg                            | 3.7 ± 2.5 abcd                                | 5.5 ± 2.9 defg                               | 20.2 ± 2.9 efg    |
|                 | Luj-Ug-FO-1                           | 16.3 ± 4.3 abcd                 | 1.5 ± 0.4 a                      | 29.7 ± 5.7 cdefg                | 6.8 ± 7.4 abc                   | 259.4 ± 23.4 bcde                          | 11.1 ± 2.0 defg                          | 10.20 ± 0.7 efg hij                     | 4.2 ± 0.8 efghi                         | 24.8 ± 3.9 abcdef                            | 6.6 ± 0.7 cdefgh                              | 4.4 ± 0.6 bdefg                              | 6.4 ± 3.0 abc     |
|                 | Luj-Ug-ZA-1                           | 4.7 ± 1.1 a                     | As                               | 19.8 ± 1.6 abcd                 | 13.7 ± 1.6 abcdef               | 307.0 ± 7.9 cdefgh                         | 9.3 ± 1.6 abcdefg                        | 3.5 ± 0.3 abcd                          | 4.0 ± 0.2 abc                           | 14.8 ± 3.1 abcd                              | 0.6 ± 0.3 ab                                  | 0.9 ± 0.3 ab                                 | 14.5 ± 3.0 bcd    |
|                 | Mai-Lu-AG-18                          | 16.7 ± 5.1 abcd                 | 3.5 ± 1.1 bc                     | 35.9 ± 4.3 defgh                | 13.3 ± 6.9 abcdef               | 360.6 ± 9.1 efghi                          | 6.5 ± 2.6 abcde                          | 7.1 ± 0.6 cdefg                         | 2.4 ± 0.2 abcdef                        | 38.1 ± 4.3 efg                               | 3.5 ± 0.5 abcd                                | 6.9 ± 1.9 fghi                               | 14.2 ± 1.1 bdefg  |
|                 | Mai-Lu-AG-20                          | 29.4 ± 1.5 de                   | 5.4 ± 0.2 de                     | 47.9 ± 2.3 ghij                 | 22.8 ± 1.5 defg                 | 360.2 ± 0.4 defghi                         | 11.7 ± 1.2 efg                           | 9.2 ± 0.1 efghij                        | 3.4 ± 0.2 cdefg                         | 41.2 ± 1.3 fg                                | 5.3 ± 0.2 abcdef                              | 9.8 ± 0.3 jk                                 | 18.3 ± 1.8 def    |
|                 | Riv-Lib-LL-1                          | 12.1 ± 1.5 abc                  | 1.7 ± 0.2 a                      | 4.2 ± 1.6 ab                    | 12.6 ± 9.9 abcde                | 163.4 ± 6.5 abc                            | 4.3 ± 2.0 abc                            | 1.2 ± 0.1 ab                            | 0.3 ± 0.1 a                             | 7.4 ± 9.0 a                                  | 0.6 ± 0.2 ab                                  | 1.6 ± 0.6 abc                                | 14.8 ± 2.7 bdefg  |
|                 | Riv-Mir-LV-4                          | 12.9 ± 1.8 abc                  | 1.3 ± 0.1 a                      | 7.3 ± 2.5 ab                    | 13.6 ± 0.5 abcdef               | 212.9 ± 3.9 abc                            | 4.1 ± 1.5 abc                            | 2.1 ± 0.1 abc                           | 0.5 ± 0 abcd                            | 9.6 ± 1.3 abc                                | 0.8 ± 0 ab                                    | 2.2 ± 0.2 abcd                               | 1.6 ± 1.3 a       |
|                 | Riv-Riv-LA-1                          | 10.2 ± 0.8 abc                  | 1.3 ± 0.1 a                      | 0.9 ± 0.4 a                     | 14.1 ± 1.3 abcdef               | 145.7 ± 1.4 a                              | 2.8 ± 0.7 a                              | 0.8 ± 0 a                               | 0.0 a                                   | 13.9 ± 1.1 abc                               | 0.1 ± 0 a                                     | 0.7 ± 0.1 a                                  | 7.8 ± 0.5 abcd    |
|                 | San-Alt-NI-1-Pi                       | 21.4 ± 2.0 cd                   | 3.4 ± 0.3 bc                     | 43.5 ± 2.7 fghij                | 9.7 ± 1.6 abcd                  | 382.5 ± 2.9 hi                             | 6.4 ± 1.5 abcde                          | 10.5 ± 0.3 fghij                        | 3.5 ± 0.2 defgh                         | 45.4 ± 0.5 fg                                | 4.5 ± 0.3 abcdef                              | 8.1 ± 0.4 ghij                               | 14.0 ± 1.2 abcde  |
|                 | San-Alt-NI-1-Pr                       | 17.9 ± 0.3 abcd                 | 1.2 ± 0.1 a                      | 11.8 ± 1.5 abc                  | 12.8 ± 0.8 abcdef               | 254.6 ± 6.6 bcd                            | 3.4 ± 0.6 ab                             | 5.0 ± 0.2 abcde                         | 1.5 ± 0.2 abcde                         | 26.9 ± 3.0 abcdefg                           | 1.8 ± 0.1 abc                                 | 4.0 ± 0.5 abcdef                             | 4.3 ± 1.2 ab      |
|                 | San-Alt-NI-2-Pr                       | 7.6 ± 1.1 ab                    | 1.0 ± 0.1 a                      | 21.4 ± 4.0 abcde                | 10.5 ± 9.0 abcd                 | 274.0 ± 38.6 defghi                        | 7.8 ± 1.9 abcdefg                        | 5.3 ± 0.5 abcdef                        | 1.7 ± 0.3 abcde                         | 10.9 ± 4.1 abc                               | 5.2 ± 0.6 abcdef                              | 2.8 ± 0.6 abcde                              | 7.1 ± 9.3 abc     |
|                 | San-Cep-EB-3                          | 42.7 ± 9.1 ef                   | 6.2 ± 0.7 de                     | 59.0 ± 7.1 jk                   | 18.8 ± 1.9 cdefg                | 357.8 ± 19.6 defghi                        | 6.4 ± 3.0 abcde                          | 12.8 ± 1.9 jk                           | 5.8 ± 1.4 fghi                          | 39.0 ± 4.3 fg                                | 5.8 ± 0.9 abcdefg                             | 9.2 ± 1.1 hijk                               | 16.3 ± 2.9 cdef   |
|                 | San-Cep-EC-5                          | 19.4 ± 4.5 bcd                  | 2.3 ± 0.3 ab                     | 41.1 ± 5.9 efghi                | 15.9 ± 1.8 abcdef               | 366.6 ± 23.9 fghi                          | 5.7 ± 2.0 abcde                          | 10.0 ± 1.7 efghij                       | 3.7 ± 1.0 efg                           | 46.0 ± 5.4 fg                                | 4.1 ± 0.9 abcde                               | 4.6 ± 0.9 cdefg                              | 12.1 ± 4.1 abcdef |
|                 | Tun-AI-BV-5                           | 27.4 ± 5.1 d                    | 2.2 ± 0.6 ab                     | 50.0 ± 2.5 ghj                  | 13.4 ± 4.1 abcdef               | 372.6 ± 20.7 ghi                           | 7.7 ± 1.6 abcdef                         | 10.7 ± 1.9 hijk                         | 6.6 ± 1.0 hijk                          | 39.6 ± 3.7 fg                                | 8.9 ± 3.7 defghij                             | 12.2 ± 1.6 k                                 | 23.0 ± 3.9 fg     |
|                 | Tun-AI-CC-1                           | 7.4 ± 3.6 ab                    | 0.8 ± 0.2 a                      | 23.8 ± 5.3 bcd                  | 16.4 ± 1.1 bcd                  | 310.6 ± 28.0 cdefgh                        | 6.2 ± 1.3 abcde                          | 6.2 ± 1.3 bcd                           | 3.6 ± 1.1 efgh                          | 26.5 ± 4.1 abcdefg                           | 9.4 ± 1.4 efghij                              | 6.0 ± 0.8 efg                                | 11.1 ± 1.5 abcde  |
| Tun-Ch-MU-3     | 19.5 ± 2.9 bcd                        | 1.2 ± 0.3 a                     | 43.5 ± 3.4 fghij                 | 1.4 ± 0.7 a                     | 380.9 ± 0.9 hi                  | 8.4 ± 2.4 abcdefg                          | 11.5 ± 0.6 hij                           | 6.3 ± 0.7 hij                           | 46.6 ± 3.5 g                            | 7.5 ± 4.0 defghij                            | 8.1 ± 0.2 ghij                                | 22.8 ± 0.1 fg                                |                   |
| Tup-Gy-AD-3-MBT | 83.8 ± 7.8 h                          | 8.6 ± 1.2 f                     | 97.3 ± 9.4 i                     | 32.4 ± 3.7 g                    | 452.7 ± 36.9 i                  | 10.4 ± 2.8 defg                            | 18.3 ± 0.5 k                             | 10.4 ± 1.7 m                            | 36.1 ± 3.5 defg                         | 13.9 ± 2.9 j                                 | 12.6 ± 1.9 k                                  | 37.7 ± 4.7 h                                 |                   |
| Tup-Gy-AD-6-Pi  | 47.2 ± 3.4 fg                         | 5.7 ± 0.1 de                    | 64.1 ± 0.2 jk                    | 26.5 ± 0.7 g                    | 380.9 ± 16.0 hi                 | 11.7 ± 2.8 efg                             | 13.1 ± 0.8 jk                            | 7.0 ± 0.5 jkl                           | 29.8 ± 1.7 bdefg                        | 10.9 ± 0.6 ghij                              | 10.3 ± 0.9 jk                                 | 20.3 ± 1.5 efg                               |                   |
| Tup-Gy-AD-6-Pr  | 58.5 ± 6.1 g                          | 6.7 ± 0.8 e                     | 74.4 ± 4.0 k                     | 27.3 ± 1.9 fg                   | 373.0 ± 17.6 ghi                | 9.5 ± 0.5 bcd                              | 14.3 ± 1.8 jk                            | 9.5 ± 0.8 klm                           | 27.7 ± 1.5 abcdefg                      | 13.0 ± 1.0 j                                 | 11.4 ± 0.8 jk                                 | 30.2 ± 0.8 fg                                |                   |
| Tup-Gy-AD-7     | 46.5 ± 3.3 fg                         | 4.9 ± 0.6 cd                    | 61.5 ± 6.0 jk                    | 14.7 ± 2.8 abcdef               | 318.7 ± 21.2 defgh              | 14.2 ± 2.6 fg                              | 11.2 ± 0.2 ghij                          | 8.6 ± 0.6 klm                           | 17.2 ± 2.3 abcde                        | 9.9 ± 0.5 fghij                              | 6.9 ± 0.6 fghi                                | 18.8 ± 3.2 efg                               |                   |
| Tup-Gy-AD-9     | 49.8 ± 0.7 fg                         | 5.1 ± 0.2 d                     | 63.2 ± 2.0 jk                    | 21.8 ± 1.2 defg                 | 354.5 ± 11.8 defghi             | 14.4 ± 3.1 g                               | 13.4 ± 0.2 jk                            | 9.9 ± 0.4 m                             | 26.2 ± 2.7 abcdefg                      | 11.4 ± 0.3 hij                               | 9.9 ± 0.8 jk                                  | 22.1 ± 4.1 efg                               |                   |
| Tup-Gy-GA-3     | 46.6 ± 2.9 fg                         | 6.0 ± 0.1 d                     | 52.2 ± 2.6 hij                   | 11.9 ± 0.8 abcde                | 262.2 ± 6.3 bcd                 | 6.2 ± 1.0 abcde                            | 11.0 ± 0.1 ghij                          | 6.6 ± 0.9 hijk                          | 14.2 ± 0.6 abc                          | 7.1 ± 3.1 cdefgh                             | 5.9 ± 0.5 efg                                 | 13.0 ± 1.4 bcd                               |                   |
| Tup-SJ-JM-1     | 27.9 ± 6.0 d                          | 1.7 ± 0.3 a                     | 47.6 ± 6.8 ghij                  | 3.3 ± 0.6 ab                    | 354.1 ± 31.0 defghi             | 12.1 ± 3.8 efg                             | 11.6 ± 1.8 hij                           | 6.2 ± 1.4 ghij                          | 33.3 ± 4.4 cdefg                        | 5.5 ± 3.2 abcdefg                            | 7.6 ± 0.9 fghi                                | 17.1 ± 5.1 cdef                              |                   |
| Departments     | Lujan de Cuyo                         | 12.9 ± 7.1 a                    | 1.8 ± 0.3 a                      | 26.8 ± 6.1 ab                   | 9.0 ± 4.0 a                     | 291.0 ± 27.3 ab                            | 8.4 ± 3.2 ab                             | 7.4 ± 3.5 ab                            | 24.1 ± 8.9 ab                           | 3.6 ± 2.0 ab                                 | 3.7 ± 6.9 a                                   | 13.7 ± 6.9 a                                 |                   |
|                 | Maipu                                 | 23.0 ± 9.0 ab                   | 4.4 ± 1.4 a                      | 41.9 ± 8.5 bc                   | 18.0 ± 6.7 a                    | 360.4 ± 0.2 b                              | 9.1 ± 3.6 ab                             | 8.1 ± 1.5 ab                            | 29.9 ± 0.7 ab                           | 39.7 ± 2.2 b                                 | 4.4 ± 1.3 ab                                  | 8.4 ± 2.1 b                                  | 16.2 ± 2.9 a      |
|                 | Rivadavia                             | 11.7 ± 1.4 a                    | 1.4 ± 0.3 a                      | 4.2 ± 3.2 a                     | 13.4 ± 0.8 a                    | 174.0 ± 34.8 a                             | 3.7 ± 0.8 a                              | 1.4 ± 0.7 a                             | 3.0 ± 0.2 a                             | 10.3 ± 3.3 a                                 | 0.5 ± 0.4 a                                   | 1.5 ± 0.8 a                                  | 8.1 ± 6.6 a       |
|                 | San Carlos                            | 21.8 ± 12.8 ab                  | 2.8 ± 2.1 a                      | 35.4 ± 18.8 abc                 | 13.5 ± 3.8 a                    | 327.1 ± 58.4 b                             | 6.0 ± 1.6 ab                             | 8.7 ± 3.4 b                             | 3.2 ± 1.6 ab                            | 33.6 ± 14.9 ab                               | 4.3 ± 1.5 ab                                  | 5.7 ± 2.8 ab                                 | 10.7 ± 4.9 a      |
|                 | Tunuyan                               | 18.1 ± 10.0 a                   | 1.4 ± 0.7 a                      | 39.1 ± 13.6 abc                 | 10.4 ± 7.9 a                    | 354.7 ± 38.4 b                             | 7.4 ± 1.1 ab                             | 9.5 ± 2.9 b                             | 5.5 ± 1.6 bc                            | 37.6 ± 18.2 b                                | 8.6 ± 1.0 bc                                  | 8.8 ± 3.2 b                                  | 19.0 ± 6.8 a      |
| Zones           | Tupungato                             | 51.5 ± 16.9 b                   | 5.5 ± 2.1 a                      | 65.8 ± 16.4 c                   | 19.7 ± 10.2 a                   | 356.6 ± 58.4 b                             | 11.2 ± 2.8 b                             | 13.3 ± 2.5 b                            | 8.3 ± 1.7 c                             | 26.4 ± 8.0 b                                 | 10.2 ± 3.1 c                                  | 9.2 ± 2.5 b                                  | 22.7 ± 8.5 a      |
|                 | East zone                             | 11.7 ± 1.4 a                    | 1.4 ± 0.3 a                      | 4.2 ± 3.2 a                     | 13.4 ± 0.8 a                    | 174.0 ± 34.8 a                             | 3.7 ± 0.8 a                              | 1.4 ± 0.7 a                             | 3.0 ± 0.2 a                             | 10.3 ± 3.3 a                                 | 0.5 ± 0.4 a                                   | 1.5 ± 0.8 a                                  | 8.1 ± 6.6 a       |
|                 | First zone                            | 16.9 ± 8.8 a                    | 2.8 ± 1.6 a                      | 32.9 ± 10.3 ab                  | 12.6 ± 6.6 a                    | 318.8 ± 42.6 b                             | 8.7 ± 2.9 b                              | 7.7 ± 2.6 b                             | 2.7 ± 1.4 ab                            | 30.3 ± 10.7 b                                | 3.9 ± 2.2 ab                                  | 5.5 ± 3.3 ab                                 | 14.7 ± 5.3 a      |
|                 | Uco Valley                            | 34.9 ± 21.0 a                   | 3.8 ± 2.5 a                      | 50.3 ± 21.6 b                   | 15.8 ± 8.6 a                    | 346.4 ± 53.3 b                             | 8.7 ± 3.3 b                              | 11.0 ± 3.5 b                            | 6.0 ± 2.8 b                             | 31.0 ± 11.3 b                                | 7.9 ± 3.5 b                                   | 8.0 ± 3.0 b                                  | 18.0 ± 8.6 a      |

  

| Location        | LMW-PCs           |                    |                   |                     |                       |                         |                   |                       |                          |                       |                        |                            |                                 |                     |                               |                  |
|-----------------|-------------------|--------------------|-------------------|---------------------|-----------------------|-------------------------|-------------------|-----------------------|--------------------------|-----------------------|------------------------|----------------------------|---------------------------------|---------------------|-------------------------------|------------------|
|                 | Gallic acid - 370 | OH-Tyrosol - 82755 | Tyrosol - 10393   | (+)-Catechin - 9064 | Syringic acid - 10742 | (-)-Epicatechin - 72276 | Astilbin - 119258 | Caffeic acid - 689043 | p-coumaric acid - 637542 | Ferulic acid - 445858 | trans-Piceid - 5281718 | trans-resveratrol - 445154 | Quercetin-3-glucoside - 5280004 | Quercetin - 5280343 | (-)-Gallicocatechin - 9882981 |                  |
| Parcels         | Luj-Agr-LP-1-80   | 27.0 ± 4.2 def     | 3.8 ± 0.8 ghi     | 37.7 ± 11.6 cdef    | 21.5 ± 6.9 abc        | 16.3 ± 3.5 d            | 23.3 ± 4.3 bcd    | 4.6 ± 1.1 abcd        | 11.9 ± 2.6 fg            | 23.3 ± 6.2 de         | 1.3 ± 0.5 abc          | 0.7 ± 0.3 a                | 4.4 ± 1.0 abc                   | 8.8 ± 0.6 bdefg     | 11.4 ± 1.8 ab                 |                  |
|                 | Luj-Ug-FO-1       | 27.6 ± 4.3 efg     | 2.2 ± 0.1 abcde   | 37.8 ± 1.9 cdef     | 29.3 ± 5.4 c          | 9.1 ± 1.2 ab            | 23.8 ± 2.5 bcd    | 6.9 ± 1.1 cdefg       | 5.1 ± 1.4 abcde          | 18.6 ± 4.1 bcd        | 1.0 ± 0.8 ab           | 5.5 ± 2.0 cdef             | 6.2 ± 1.0 bcde                  | 0.5 ± 0 a           | 8.8 ± 2.0 bcd                 | 10.8 ± 1.7 ab    |
|                 | Luj-Ug-ZA-1       | 15.6 ± 0.5 ab      | 2.6 ± 0.4 abcdefg | 15.5 ± 0.2 abc      | 13.1 ± 0.8 ab         | 13.2 ± 0.3 bcd          | 19.6 ± 1.0 abc    | 3.4 ± 0.4 abc         | 12.8 ± 2.3 g             | 39.6 ± 6.0 f          | 1.1 ± 0.2 ab           | 0.1 ± 0 a                  | 4.5 ± 0.7 abc                   | 0.7 ± 0.3 ab        | 2.5 ± 0.6 a                   | 10.4 ± 1.1 ab    |
|                 | Mai-Lu-AG-18      | 30.2 ± 4.4 fgh     | 2.0 ± 0.3 abcde   | 28.1 ± 2.5 bcd      | 27.9 ± 10.8 bc        | 14.9 ± 1.2 cd           | 29.7 ± 7.9 def    | 2.8 ± 1.1 ab          | 13.6 ± 1.3 g             | 21.1 ± 4.1 cd         | 1.0 ± 0.2 ab           | 2.5 ± 0.5 abcd             | 5.7 ± 0.3 abcde                 | 0.7 ± 0.1 ab        | 6.1 ± 1.0 abcd                | 17.3 ± 3.0 bcd   |
|                 | Mai-Lu-AG-20      | 26.2 ± 3.5 def     | 1.3 ± 0.2 ab      | 30.1 ± 5.7 cde      | 24.5 ± 5.3 abc        | 12.0 ± 1.0 abcd         | 20.3 ± 2.9 abc    | 6.0 ± 2.3 bcd         | 6.5 ± 0.5 cde            | 14.4 ± 1.1 abc        | 1.0 ± 0 ab             | 5.4 ± 1.5 cdef             | 3.2 ± 0.1 ab                    | 0.9 ± 0.1 ab        | 13.9 ± 0.6 gh                 | 11.8 ± 3.0 abc   |
|                 | Riv-Lib-LL-1      | 51.5 ± 3.6 i       | 3.7 ± 0.9 fghi    | 10.2 ± 2.5 a        | 20.5 ± 4.5 abc        | 27.0 ± 1.9 e            | 23.4 ± 1.1 bcd    | 4.0 ± 0.8 abc         | 24.7 ± 0.8 i             | 39.4 ± 1.3 f          | 2.8 ± 0.3 d            | 2.2 ± 1.0 abcd             | 3.1 ± 0.1 ab                    | 0.6 ± 0 a           | 6.7 ± 1.5 abcde               | 18.4 ± 4.8 de    |
|                 | Riv-Mir-LV-4      | 35.2 ± 3.3 gh      | 4.5 ± 0.9 hi      | 27.2 ± 1.6 bcd      | 29.6 ± 2.5 c          | 26.8 ± 2.8 e            | 26.4 ± 1.1 cdef   | 4.8 ± 0.6 abcde       | 34.8 ± 3.1 k             | 36.0 ± 11.2 ef        | 2.1 ± 0.4 bcd          | 0.7 ± 1.0 a                | 5.3 ± 1.3 abcde                 | 0.6 ± 0 a           | 7.4 ± 1.6 abcdef              | 18.5 ± 4.2 cde   |
|                 | Riv-Riv-LA-1      | 26.9 ± 3.2 def     | 4.0 ± 0.1 ghi     | 7.1 ± 1.1 a         | 10.6 ± 1.7 a          | 29.6 ± 1.0 e            | 19.5 ± 1.9 abc    | 2.1 ± 0.2 a           | 30.3 ± 1.7 j             | 46.5 ± 6.9 f          | 2.6 ± 0.2 cd           | 0.4 ± 0.2 a                | 4.0 ± 0.3 abc                   | 0.6 ± 0 a           | 6.5 ± 1.0 abcde               | 17.3 ± 0.6 bcd   |
|                 | San-Alt-NI-1-Pi   | 16.6 ± 2.0 abc     | 2.7 ± 0 bcd       | 39.3 ± 3.6 cdef     | 20.5 ± 2.3 abc        | 14.8 ± 0.2 cd           | 20.3 ± 1.9 abc    | 6.4 ± 0.7 bcd         | 6.7 ± 0.1 cde            | 20.9 ± 0.6 cd         | 1.1 ± 0.1 ab           | 0.9 ± 0.1 ab               | 5.6 ± 0.7 abcde                 | 1.3 ± 0 b           | 7.2 ± 0.5 abcdef              | 14.1 ± 0.9 abcd  |
|                 | San-Alt-NI-1-Pr   | 23.9 ± 1.0 cdef    | 3.6 ± 0.5 efghi   | 36.8 ± 2.8 cdef     | 31.7 ± 3.5 c          | 13.4 ± 0.9 bcd          | 30.2 ± 3.4 ef     | 3.8 ± 0.2 abc         | 8.3 ± 1.0 ef             | 17.8 ± 0.5 bcd        | 1.0 ± 0.1 ab           | 0.2 ± 0 a                  | 5.2 ± 0.3 abcde                 | 0.6 ± 0 a           | 4.2 ± 0.4 ab                  | 15.8 ± 3.3 abcde |
|                 | San-Alt-NI-2-Pr   | 22.2 ± 0.3 bcd     | 3.3 ± 0.1 defghi  | 25.4 ± 2.0 bc       | 28.1 ± 1.3 c          | 13.6 ± 0.2 bcd          | 28.0 ± 0.6 cdef   | 4.2 ± 1.0 abc         | 18.7 ± 1.0 h             | 43.4 ± 2.7 f          | 1.8 ± 0 bcd            | 0.3 ± 0.1 a                | 6.8 ± 1.8 cde                   | 0.6 ± 0.1 a         | 5.2 ± 0.8 abc                 | 12.7 ± 0.9 abcd  |
|                 | San-Cep-EB-3      | 21.7 ± 2.8 bcde    | 2.9 ± 0.5 cdefg   | 37.8 ± 4.4 cdef     | 24.3 ± 6.4 abc        | 13.5 ± 0.8 bcd          | 21.2 ± 5.7 abcde  | 3.7 ± 2.0 abc         | 8.1 ± 1.0 def            | 17.8 ± 1.8 bcd        | 0.9 ± 0.2 ab           | 0.6 ± 0.4 a                | 6.8 ± 1.8 cde                   | 1.0 ± 0.5 ab        | 11.5 ± 6.7 defgh              | 13.2 ± 3.3 abcd  |
|                 | San-Cep-EC-5      | 19.3 ± 1.4 abcd    | 2.6 ± 0.4 abcdefg | 45.1 ± 10.0 f       | 26.6 ± 3.2 bc         | 12.5 ± 1.8 abc          | 19.2 ± 1.6 abc    | 6.7 ± 0.7 cdefg       | 5.0 ± 1.0 abcde          | 13.9 ± 1.4 abcd       | 0.6 ± 0.1 a            | 1.0 ± 0.2 cdef             | 2.7 ± 0.5 a                     | 0.6 ± 0.1 a         | 7.7 ± 0.9 abcdef              | 10.3 ± 0.8 ab    |
|                 | Tun-AI-BV-5       | 15.9 ± 1.8 abc     | 2.3 ± 0.7 abcdef  | 41.2 ± 2.1 def      | 28.7 ± 2.1 c          | 11.6 ± 1.1 abc          | 14.9 ± 2.5 ab     | 8.9 ± 1.6 fg          | 1.9 ± 1.5 ab             | 7.4 ± 4.4 ab          | 1.1 ± 0.1 ab           | 3.7 ± 3.5 abcde            | 8.6 ± 2.9 efg                   | 0.9 ± 0.3 ab        | 13.6 ± 0.5 gh                 | 12.7 ± 1.1 abcd  |
|                 | Tun-AI-CC-1       | 15.7 ± 0.6 ab      | 4.5 ± 0.6 i       | 40 ± 2.1 def        | 21.6 ± 4.0 abc        | 13.3 ± 1.1 bcd          | 15.6 ± 0.8 ab     | 7.1 ± 0.2 cdefg       | 6.1 ± 1.5 bcde           | 20.9 ± 0.1 cd         | 1.0 ± 0.2 ab           | 0.4 ± 0.1 a                | 6.9 ± 0.9 cdef                  | 0.9 ± 0.1 ab        | 12.8 ± 1.3 fgh                | 12.0 ± 0.4 abc   |
| Tun-Ch-MU-3     | 15.0 ± 2.8 ab     | 2.3 ± 0 abcdef     | 39.1 ± 2.3 cdef   | 25.7 ± 11.3 bc      | 11.3 ± 0.7 abc        | 15.5 ± 2.9 ab           | 9.2 ± 1.1 fg      | 4.5 ± 0.7 abcde       | 17.7 ± 2.8 bcd           | 0.9 ± 0.1 ab          | 1.1 ± 0.3 ab           | 5.9 ± 0.2 abcde            | 0.6 ± 0.1 a                     | 10.7 ± 0.6 cdefgh   | 9.0 ± 1.5 a                   |                  |
| Tup-Gy-AD-3-MBT | 19.4 ± 1.3 abcd   | 1.6 ± 0.3 abc      | 32.5 ± 2.1 cdef   | 22.8 ± 0.6 abc      | 9.1 ± 0.8 ab          | 14.6 ± 1.7 ab           | 9.2 ± 1.1 fg      | 2.6 ± 0.8 abc         | 6.7 ± 0.6 abc            | 0.6 ± 0.1 a           | 7.4 ± 0.7 f            | 6.9 ± 1.4 cdef             | 0.5 ± 0 a                       | 12.4 ± 0.9 efg      | 14.8 ± 0.4 abcd               |                  |
| Tup-Gy-AD-6-Pi  | 19.3 ± 1.9 abcd   | 1.6 ± 0.3 abc      | 39.1 ± 3.3 cdef   | 31.4 ± 3.4 c        | 9.6 ± 0.4 ab          | 16.4 ± 2.2 ab           | 8.5 ± 0.7 efg     | 3.9 ± 0.2 abcd        | 10.0 ± 0.3 abc           | 0.8 ± 0 ab            | 2.2 ± 0.2 abcd         | 10.6 ± 1.7 g               | 0.6 ± 0 a                       | 9.6 ± 1.2 bcd       | 14.6 ± 0.6 abcd               |                  |
| Tup-Gy-AD-6-Pr  | 16.2 ± 0.5 abc    | 1.1 ± 1 a          | 2                 |                     |                       |                         |                   |                       |                          |                       |                        |                            |                                 |                     |                               |                  |

**Table S2.** Overall data of anthocyanins and LMW-PCs (Name and PubChem CID) quantified [Mean (mg L<sup>-1</sup>) ± SD] in Malbec wines from different locations of Mendoza obtained in 2017 vintage.

| Location        | Anthocyanins                          |                                 |                                  |                                 |                                 |                                            |                                          |                                         |                                         |                                              |                                               |                                              |
|-----------------|---------------------------------------|---------------------------------|----------------------------------|---------------------------------|---------------------------------|--------------------------------------------|------------------------------------------|-----------------------------------------|-----------------------------------------|----------------------------------------------|-----------------------------------------------|----------------------------------------------|
|                 | Delphinidin 3-O-glucoside - 102515359 | Cyanidin 3-O-glucoside - 197081 | Petunidin 3-O-glucoside - 443651 | Peonidin 3-O-glucoside - 443654 | Malvidin 3-O-glucoside - 443652 | Delphinidin 3-O-acetylglucoside - 15385440 | Petunidin 3-O-acetylglucoside - 44256961 | Peonidin 3-O-acetylglucoside - 44256847 | Malvidin 3-O-acetylglucoside - 72193646 | Petunidin 3-O-p-coumaroylglucoside - 9897848 | Peonidin 3-O-p-coumaroylglucoside - 131752297 | Malvidin 3-O-p-coumaroylglucoside - 71308234 |
| Luj-Agr-LP-180  | 17.2 ± 0.5 abc                        | 81.9 ± 6.7 efg                  | 6.2 ± 0.1 abcde                  | 135.8 ± 10.3 efg                | 779.6 ± 48.8 cde                | 9.8 ± 11.6 ab                              | 8.8 ± 1.2 abcde                          | 2.9 ± 0.0 ab                            | 107.9 ± 4.2 def                         | 8.3 ± 11.7 abcdef                            | 10.8 ± 0.9 abcd                               | 46.6 ± 6.7 cdef                              |
| Luj-Ug-FO-1     | 9.4 ± 1.4 ab                          | 37.4 ± 2.4 abcde                | 3.9 ± 0.2 abc                    | 79.3 ± 3.2 cd                   | 708.0 ± 9.6 bc                  | 13.8 ± 2.5 ab                              | 17.9 ± 0.6 fg                            | 3.4 ± 0.1 abcd                          | 97.9 ± 2.3 cde                          | 12.3 ± 0.2 bcdef                             | 8.7 ± 0.2 abcd                                | 45.4 ± 1.5 cdef                              |
| Luj-Ug-ZA-1     | 8.6 ± 1.4 ab                          | 37.0 ± 1.8 abc                  | 2.6 ± 0.6 ab                     | 78.7 ± 1.2 cd                   | 764.9 ± 15.8 cd                 | 5.7 ± 0.2 ab                               | 12.2 ± 0.4 abcdefg                       | 4.1 ± 0.2 abcd                          | 97.9 ± 7.7 cde                          | 10.6 ± 0.8 abcdef                            | 6.4 ± 0.4 abc                                 | 33.1 ± 1.0 abcd                              |
| Ma-Lu-AG-18     | 13.5 ± 5.6 abc                        | 32.6 ± 11.3 abc                 | 4.3 ± 1.1 abc                    | 69.0 ± 11.8 bcd                 | 625.2 ± 42.4 b                  | 14.5 ± 3.6 ab                              | 14.6 ± 2.5 cdefg                         | 3.0 ± 0.6 ab                            | 86.4 ± 7.9 bc                           | 12.6 ± 1.2 bcdef                             | 9.8 ± 1.1 abcd                                | 43.0 ± 4.3 cde                               |
| Ma-Lu-AG-20     | 5.2 ± 1.5 a                           | 13.0 ± 2.6 ab                   | 3.0 ± 0.3 abc                    | 41.8 ± 4.4 abc                  | 476.3 ± 17.9 a                  | 10.0 ± 0.8 ab                              | 9.0 ± 0.6 abcde                          | 2.7 ± 0.3 ab                            | 70.0 ± 2.4 b                            | 11.5 ± 0.6 bcdef                             | 7.5 ± 0.5 abcd                                | 44.1 ± 1.8 cde                               |
| Riv-Lib-LL-1    | 9.9 ± 7.8 ab                          | 5.4 ± 5.4 a                     | 2.5 ± 0.7 ab                     | 24.3 ± 6.7 a                    | 360.1 ± 35.9 a                  | 5.5 ± 1.2 ab                               | 5.5 ± 1.2 ab                             | 1.0 ± 0.4 a                             | 36.5 ± 3.4 a                            | 5.5 ± 1.0 abcd                               | 3.3 ± 0.7 a                                   | 19.0 ± 3.9 a                                 |
| Riv-Mir-LV-4    | 6.2 ± 9.8 a                           | 8.5 ± 1.6 ab                    | 2.6 ± 0.2 ab                     | 32.6 ± 2.2 ab                   | 392.0 ± 17.5 a                  | 3.7 ± 0.9 ab                               | 6.2 ± 0.9 abc                            | 2.8 ± 2.1 ab                            | 48.5 ± 6.1 a                            | 9.0 ± 0.5 abcdef                             | 5.4 ± 0.4 ab                                  | 33.0 ± 3.0 abc                               |
| Riv-Riv-LA-1    | 6.7 ± 1.0 a                           | 11.8 ± 2.9 ab                   | 1.2 ± 0.1 a                      | 10.7 ± 4.3 a                    | 364.3 ± 22.5 a                  | 2.5 ± 0.7 ab                               | 4.8 ± 0.6 a                              | 1.1 ± 0.1 a                             | 45.7 ± 4.6 a                            | 4.9 ± 0.8 abc                                | 3.3 ± 0.4 a                                   | 24.8 ± 2.7 ab                                |
| San-Alt-NI-1-Pr | 41.2 ± 2.7 efg                        | 73.4 ± 1.7 cdefg                | 8.8 ± 0.4 abcdef                 | 122.1 ± 1.9 ef                  | 768.8 ± 64.4 cd                 | 12.7 ± 1.7 ab                              | 4.8 ± 0.6 a                              | 3.4 ± 0.3 abc                           | 92.1 ± 2.0 cde                          | 11.7 ± 0.5 bcdef                             | 11.7 ± 0.8 abcd                               | 35.5 ± 1.0 bcd                               |
| San-Alt-NI-1-Pi | 50.8 ± 6.9 fgh                        | 94.3 ± 6.9 fgh                  | 9.4 ± 0.4 abcdef                 | 148.7 ± 7.6 fgh                 | 803.9 ± 32.5 cde                | 12.6 ± 7.0 ab                              | 9.2 ± 1.2 abcdef                         | 4.5 ± 0.6 abcd                          | 97.7 ± 4.7 cde                          | 14.9 ± 1.1 def                               | 14.0 ± 0.6 bcd                                | 41.7 ± 3.7 cde                               |
| San-Alt-NI-2-Pr | 63.1 ± 5.1 ij                         | 99.6 ± 17.0 g                   | 10.2 ± 1.1 bcdef                 | 156.0 ± 18.0 fghi               | 866.0 ± 44.9 de                 | 11.1 ± 7.8 ab                              | 10.3 ± 2.5 abcdef                        | 4.5 ± 0.7 abcd                          | 110.6 ± 4.5 ef                          | 15.4 ± 1.9 ef                                | 16.5 ± 1.8 d                                  | 45.6 ± 2.2 cdef                              |
| San-Cep-EB-3    | 35.9 ± 7.1 defg                       | 117.4 ± 16.0 ghi                | 11.2 ± 1.8 cdef                  | 167.9 ± 13.2 ghi                | 842.1 ± 30.8 de                 | 11.3 ± 3.8 ab                              | 14.0 ± 2.0 bcdefg                        | 5.9 ± 1.2 bcdef                         | 109.7 ± 5.8 def                         | 15.2 ± 1.1 def                               | 10.0 ± 1.0 abcd                               | 35.2 ± 3.0 bcd                               |
| San-Cep-EC-5    | 25.6 ± 3.9 bcde                       | 88.0 ± 11.7 fg                  | 7.5 ± 0.6 abcdef                 | 143.8 ± 13.7 efg                | 806.5 ± 40.9 cde                | 14.7 ± 0.3 ab                              | 9.3 ± 2.2 abcdef                         | 6.6 ± 1.8 bcd                           | 106.3 ± 6.7 cdef                        | 16.6 ± 3.0 f                                 | 11.2 ± 2.1 abcd                               | 45.4 ± 9.1 cdef                              |
| Tun-Alt-BV-5    | 44.1 ± 2.3 fgh                        | 103.0 ± 11.7 gh                 | 10.4 ± 0.8 bcdef                 | 156.7 ± 8.3 fghi                | 809.2 ± 22.2 cde                | 17.1 ± 1.3 a                               | 11.9 ± 0.6 abcdefg                       | 7.7 ± 1.1 cd                            | 106.4 ± 8.6 cdef                        | 1.5 ± 1.0 a                                  | 15.6 ± 0.8 cd                                 | 62.7 ± 4.2 g                                 |
| Tun-Alt-CC-1    | 21.0 ± 4.4 abcd                       | 53.0 ± 8.3 bcdef                | 5.6 ± 0.7 abcd                   | 101.6 ± 9.5 de                  | 737.5 ± 37.1 bcd                | 15.8 ± 1.2 ab                              | 6.9 ± 9.4 abcd                           | 4.1 ± 0.5 abcd                          | 86.3 ± 5.4 bc                           | 13.0 ± 1.1 bcdef                             | 10.1 ± 1.0 abcd                               | 39.5 ± 6.2 cde                               |
| Tun-Ch-MU-3     | 38.4 ± 0.1 defg                       | 76.7 ± 1.6 cdefg                | 7.9 ± 0.1 abcdef                 | 129.9 ± 0.6 efg                 | 804.2 ± 43.4 cde                | 17.1 ± 1.1 b                               | 5.4 ± 0.2 ab                             | 5.7 ± 0.2 bcd                           | 103.8 ± 9.4 cdef                        | 17.3 ± 0.2 f                                 | 15.0 ± 0.4 bcd                                | 51.7 ± 2.4 fg                                |
| Tup-Gy-AD-3-MBT | 61.8 ± 9.0 hij                        | 172.7 ± 21.5 jk                 | 14.3 ± 3.0 ef                    | 220.5 ± 20.9 jkl                | 1009.9 ± 57.7 fg                | 13.8 ± 3.8 ab                              | 19.4 ± 2.1 g                             | 12.6 ± 1.7 e                            | 122.4 ± 6.4 fg                          | 3.3 ± 1.4 ab                                 | 14.8 ± 1.4 bcd                                | 47.2 ± 5.7 g                                 |
| Tup-Gy-AD-6-Pi  | 69.5 ± 4.3 j                          | 147.5 ± 15.7 hij                | 12.7 ± 9.7 def                   | 189.2 ± 20.0 hij                | 788.7 ± 29.5 cde                | 11.1 ± 1.6 a                               | 15.2 ± 2.0 defg                          | 7.3 ± 0.5 abc                           | 94.3 ± 5.1 cde                          | 5.6 ± 8.7 abcd                               | 15.2 ± 0.8 bcd                                | 42.6 ± 3.1 cde                               |
| Tup-Gy-AD-6-Pr  | 92.8 ± 11.6 k                         | 202.4 ± 35.9 k                  | 5.4 ± 3.2 abcd                   | 235.1 ± 23.4 kl                 | 866.4 ± 42.3 ef                 | 3.8 ± 2.9 ab                               | 19.8 ± 3.6 g                             | 13.1 ± 3.8 e                            | 89.2 ± 4.1 bcd                          | 4.8 ± 3.7 abc                                | 5.8 ± 8.4 abc                                 | 58.4 ± 8.5 fg                                |
| Tup-Gy-AD-7     | 103.3 ± 2.9 k                         | 210.7 ± 7.7 k                   | 8.5 ± 2.1 abcdef                 | 248.3 ± 3.7 l                   | 908.0 ± 28.6 ef                 | 4.8 ± 2.8 ab                               | 20.1 ± 0.2 g                             | 12.4 ± 1.0 e                            | 96.1 ± 1.2 cde                          | 6.3 ± 0.5 abcde                              | 6.6 ± 10.1 abcd                               | 64.5 ± 0.1 g                                 |
| Tup-Gy-AD-9     | 59.7 ± 3.4 hij                        | 149.4 ± 12.1 ij                 | 15.0 ± 1.7 f                     | 196.9 ± 9.7 jkl                 | 870.0 ± 19.1 de                 | 8.6 ± 8.5 ab                               | 16.6 ± 0.7 efg                           | 6.9 ± 0.9 bcd                           | 102.2 ± 3.7 cdef                        | 16.5 ± 1.0 f                                 | 12.6 ± 0.6 abcd                               | 35.7 ± 1.3 bcd                               |
| Tup-Gy-GA-3     | 53.6 ± 9.4 ghj                        | 167.0 ± 24.1 jk                 | 8.5 ± 2.4 abcdef                 | 222.9 ± 29.6 jkl                | 1084.0 ± 117.2 g                | 6.3 ± 9.5 ab                               | 20.7 ± 3.9 g                             | 16.4 ± 2.4 e                            | 131.5 ± 2.4 e                           | 6.0 ± 2.5 abcde                              | 15.7 ± 2.5 cd                                 | 51.6 ± 7.7 efg                               |
| Tup-SJ-JM-1     | 29.2 ± 1.9 cdef                       | 80.0 ± 4.1 defg                 | 7.6 ± 0.6 abcdef                 | 124.5 ± 6.8 ef                  | 795.1 ± 23.8 cde                | 14.7 ± 3.2 ab                              | 5.1 ± 0.5 a                              | 4.3 ± 0.2 abcd                          | 103.2 ± 3.5 cdef                        | 13.4 ± 0.5 cdef                              | 9.7 ± 0.3 abcd                                | 36.5 ± 2.7 bcd                               |
| Lujan de Cuyo   | 11.8 ± 4.8 a                          | 52.1 ± 25.8 ab                  | 4.2 ± 1.8 abc                    | 98.0 ± 32.8 abc                 | 750.8 ± 37.8 b                  | 9.8 ± 4.1 a                                | 12.9 ± 4.6 ab                            | 3.5 ± 0.6 a                             | 101.2 ± 5.7 b                           | 10.4 ± 2.0 a                                 | 8.6 ± 2.2 ab                                  | 41.7 ± 7.5 ab                                |
| Maipu           | 9.4 ± 5.9 a                           | 22.8 ± 13.8 ab                  | 3.6 ± 0.9 ab                     | 55.4 ± 19.2 ab                  | 550.8 ± 105.3 a                 | 12.3 ± 3.2 a                               | 11.8 ± 4.0 ab                            | 2.9 ± 0.3 a                             | 78.2 ± 11.6 b                           | 12.1 ± 0.7 a                                 | 8.7 ± 1.6 ab                                  | 43.5 ± 0.7 ab                                |
| Rivadavia       | 7.6 ± 2.0 a                           | 8.6 ± 3.2 a                     | 2.1 ± 0.8 a                      | 37.2 ± 11.1 a                   | 372.1 ± 17.3 a                  | 4.2 ± 2.1 a                                | 5.5 ± 0.7 a                              | 1.6 ± 1.0 a                             | 43.6 ± 6.3 a                            | 6.5 ± 2.2 a                                  | 4.0 ± 1.2 a                                   | 25.6 ± 7.0 a                                 |
| San Carlos      | 43.3 ± 14.3 ab                        | 94.6 ± 16.1 bc                  | 9.4 ± 1.4 bc                     | 147.4 ± 16.9 cd                 | 817.5 ± 37.5 b                  | 12.8 ± 1.3 a                               | 9.5 ± 3.3 ab                             | 4.9 ± 1.3 ab                            | 103.3 ± 8.1 b                           | 14.8 ± 1.8 a                                 | 12.7 ± 2.6 b                                  | 40.7 ± 5.1 ab                                |
| Tunuyan         | 34.5 ± 12.0 ab                        | 77.6 ± 25.0 ab                  | 8.0 ± 2.4 abc                    | 129.4 ± 27.5 bcd                | 783.6 ± 40.0 b                  | 11.5 ± 8.5 a                               | 8.1 ± 3.4 ab                             | 5.8 ± 1.8 ab                            | 98.8 ± 10.9 b                           | 10.6 ± 8.2 a                                 | 13.6 ± 3.0 b                                  | 51.3 ± 11.6 b                                |
| Tupungato       | 67.1 ± 24.8 b                         | 161.4 ± 43.3 c                  | 10.3 ± 3.7 c                     | 204.4 ± 41.6 d                  | 903.3 ± 109.3 b                 | 7.6 ± 5.1 a                                | 16.7 ± 5.5 b                             | 10.4 ± 4.3 b                            | 105.6 ± 15.6 b                          | 8.0 ± 4.9 a                                  | 11.5 ± 4.2 ab                                 | 48.1 ± 10.9 b                                |
| East zone       | 7.6 ± 2.0 a                           | 8.6 ± 3.2 a                     | 2.1 ± 0.8 a                      | 22.6 ± 11.1 a                   | 372.1 ± 17.3 a                  | 4.2 ± 2.1 a                                | 5.5 ± 0.7 a                              | 1.6 ± 1.0 a                             | 43.6 ± 6.3 a                            | 6.5 ± 2.2 a                                  | 4.0 ± 1.2 a                                   | 25.6 ± 7.0 a                                 |
| First zone      | 10.8 ± 4.7 a                          | 40.4 ± 25.3 a                   | 4.0 ± 1.4 a                      | 80.9 ± 34.3 a                   | 670.8 ± 124.5 b                 | 10.8 ± 3.6 a                               | 12.5 ± 3.9 a                             | 3.2 ± 0.5 ab                            | 92.0 ± 14.5 b                           | 11.1 ± 1.7 a                                 | 8.6 ± 1.8 ab                                  | 42.4 ± 5.4 b                                 |
| Uco Valley      | 52.7 ± 23.4 b                         | 122.3 ± 49.3 b                  | 9.5 ± 2.8 b                      | 170.5 ± 45.3 b                  | 850.8 ± 92.1 c                  | 10.1 ± 5.3 a                               | 12.6 ± 5.8 a                             | 7.7 ± 4.0 b                             | 103.5 ± 12.1 b                          | 10.8 ± 5.5 a                                 | 12.3 ± 3.4 b                                  | 46.3 ± 9.8 b                                 |

  

| Location        | LMW-PCs           |                    |                   |                     |                       |                         |                   |                       |                          |                       |                        |                            |                                |                     |                            |
|-----------------|-------------------|--------------------|-------------------|---------------------|-----------------------|-------------------------|-------------------|-----------------------|--------------------------|-----------------------|------------------------|----------------------------|--------------------------------|---------------------|----------------------------|
|                 | Gallic acid - 370 | OH-Tyrosol - 82755 | Tyrosol - 10393   | (+)-Catechin - 9064 | Syringic acid - 10742 | (-)-Epicatechin - 72726 | Astilbin - 119258 | Caffeic acid - 689043 | p-coumaric acid - 637542 | Ferulic acid - 445858 | trans-Piceid - 5281718 | trans-resveratrol - 445154 | Quercetin-3-glucoside - 528044 | Quercetin - 5280343 | (-)-Gallocatechin - 982891 |
| Luj-Agr-LP-180  | 30.8 ± 4.1 bcd    | 0.4 ± 0.6 a        | 19.1 ± 1.4 def    | 20.0 ± 7.7 a        | 4.2 ± 4.4 a           | 62.8 ± 1.5 ab           | 7.6 ± 2.3 a       | 14.0 ± 1.5 efg        | 19.7 ± 1.3 fghi          | 0.1 ± 0.1 ab          | 0.1 ± 0.0 a            | 2.5 ± 0.1 a                | 5.2 ± 5.3 abc                  | 9.3 ± 0.7 bcdefgh   | 5.8 ± 0.5 bcd              |
| Luj-Ug-FO-1     | 21.6 ± 3.3 abc    | 0.0 a              | 12.7 ± 1.9 ab     | 24.8 ± 9.1 a        | 11.3 ± 2.2 bcd        | 17.3 ± 6.6 ab           | 11.2 ± 2.9 abc    | 8.7 ± 1.0 cde         | 31.1 ± 5.1 jk            | 0.8 ± 0.1 defg        | 0.5 ± 0.4 a            | 8.9 ± 0.7 ef               | 2.5 ± 0.1 a                    | 4.7 ± 0.7 ab        | 5.5 ± 0.7 bc               |
| Luj-Ug-ZA-1     | 29.7 ± 1.5 abcd   | 0.0 a              | 14.1 ± 0.4 abcd   | 27.6 ± 14.6 a       | 13.2 ± 2.8 bcdef      | 49.7 ± 34.3 ab          | 13.4 ± 2.8 abcd   | 11.7 ± 0.2 def        | 46.5 ± 2.4 l             | 0.8 ± 0.2 cdefg       | 0.4 ± 0.1 a            | 7.9 ± 1.5 cdef             | 2.2 ± 1.3 a                    | 5.6 ± 0.5 abc       | 8.4 ± 1.6 bcdef            |
| Ma-Lu-AG-18     | 25.1 ± 1.5 abcd   | 0.6 ± 0.5 abc      | 14.5 ± 0.9 abcde  | 22.2 ± 7.5 a        | 14.2 ± 0.5 bcdef      | 16.1 ± 7.2 ab           | 15.2 ± 4.4 abcd   | 6.4 ± 1.5 abcde       | 16.7 ± 3.5 efg           | 0.8 ± 0.0 defg        | 0.9 ± 0.3 a            | 9.8 ± 1.6 ef               | 2.9 ± 0.8 ab                   | 10.7 ± 2.8 cdefghi  | 6.2 ± 0.9 bcde             |
| Ma-Lu-AG-20     | 33.8 ± 1.1 bcd    | 0.9 ± 0.1 abc      | 17.7 ± 0.7 abcdef | 27.9 ± 7.5 a        | 17.6 ± 0.7 fg         | 23.9 ± 4.2 ab           | 18.2 ± 1.8 abcd   | 6.0 ± 0.5 abcde       | 15.0 ± 2.2 efg           | 0.6 ± 0.0 cdef        | 1.0 ± 0.2 a            | 2.7 ± 0.3 abc              | 3.7 ± 0.4 abc                  | 10.4 ± 1.0 cdefghi  | 8.0 ± 0.8 bcdef            |
| Riv-Lib-LL-1    | 37.6 ± 7.3 d      | 0.6 ± 1.0 ab       | 17.0 ± 1.2 abcdef | 37.9 ± 12.8 a       | 14.6 ± 0.5 cdef       | 21.2 ± 5.7 ab           | 16.3 ± 1.8 abcd   | 21.2 ± 1.7 g          | 26.4 ± 3.9 ij            | 0.6 ± 0.3 cdef        | 0.4 ± 0.2 a            | 2.1 ± 0.0 ab               | 3.2 ± 0.3 abc                  | 8.2 ± 1.0 abcde     | 8.4 ± 0.6 bcdef            |
| Riv-Mir-LV-4    | 54.1 ± 0.7 e      | 0.7 ± 0.7 abc      | 27.0 ± 0.7 h      | 26.5 ± 5.2 a        | 21.1 ± 3.2 g          | 57.1 ± 48.6 ab          | 19.6 ± 2.3 abcde  | 18.8 ± 4.2 fg         | 21.2 ± 2.3 ghi           | 0.02 ± 0.03 a         | 0.1 ± 0.0 a            | 0.8 ± 0.3 a                | 3.0 ± 1.2 ab                   | 14.8 ± 0.5 hij      | 10.2 ± 0.3 ef              |
| Riv-Riv-LA-1    | 15.1 ± 12.6 a     | 0.4 ± 0.6 a        | 18.8 ± 1.1 def    | 21.0 ± 16.1 a       | 15.8 ± 0.8 defg       | 12.4 ± 13.7 a           | 8.7 ± 4.7 ab      | 38.2 ± 9.1 h          | 38.9 ± 4.3 kl            | 0.03 ± 0.06 a         | 0.1 ± 0.1 a            | 0.2 ± 0.2 a                | 2.3 ± 1.0 a                    | 3.5 ± 0.5 a         | 1.1 ± 1.8 a                |
| San-Alt-NI-1-Pi | 31.9 ± 1.4 bcd    | 3.5 ± 2.3 abcde    | 20.6 ± 0.7 fg     | 24.1 ± 5.4 a        | 15.1 ± 0.5 cdef       | 18.8 ± 6.9 ab           | 13.7 ± 1.9 abcd   | 7.8 ± 1.8 abcde       | 25.9 ± 2.4 ij            | 0.9 ± 0.1 defg        | 0.1 ± 0.0 a            | 6.8 ± 1.5 cde              | 2.1 ± 0.8 a                    | 6.6 ± 0.8 abc       | 9.1 ± 0.3 bcdef            |
| San-Alt-NI-1-Pr | 28.4 ± 2.2 abcd   | 5.4 ± 0.8 bcde     | 19.7 ± 0.7 def    | 21.9 ± 9.4 a        | 14.6 ± 0.3 cdef       | 16.6 ± 7.0 ab           | 16.0 ± 2.0 abcd   | 7.1 ± 0.8 abcde       | 24.9 ± 3.0 hij           | 0.9 ± 0.1 efg         | 0.1 ± 0.0 a            | 8.1 ± 0.8 def              | 1.8 ± 0.4 a                    | 7.3 ± 0.7 abcd      | 8.2 ± 1.1 bcdef            |
| San-Alt-NI-2-Pr | 28.4 ± 1.4 abcd   | 3.2 ± 0.6 abcd     | 18.0 ± 1.1 bcdef  | 54.1 ± 11.9 a       | 11.8 ± 1.4 bcde       | 29.2 ± 2.2 ab           | 19.0 ± 1.2 abcde  | 26.1 ± 1.1 ij         | 1.1 ± 0.1 g              | 0.5 ± 0.2 a           | 1.1 ± 1.2 f            | 3.2 ± 0.6 ab               | 8.4 ± 0.8 abcdef               | 10.1 ± 0.5 ef       | 10.1 ± 0.5 ef              |
| San-Cep-EB-3    | 26.2 ± 8.4 abcd   | 1.5 ± 1.5 abc      | 15.6 ± 3.8 abcdef | 25.4 ± 17.5 a       | 10.2 ± 1.7 bc         | 24.1 ± 23.1 ab          | 13.7 ± 7.1 abcd   | 5.4 ± 0.8 abcde       | 19.7 ± 3.8 fghi          | 0.5 ± 0.3 bcdef       | 0.4 ± 0.2 a            | 2.5 ± 0.7 ab               | 2.0 ± 0.5 a                    | 8.6 ± 1.5 abcdefg   | 8.0 ± 1.9 bcdef            |
| San-Cep-EC-5    | 25.7 ± 0.1 abcd   | 8.2 ± 1.8 e        | 18.5 ± 1.5 bcdef  | 32.5 ± 11.8 a       | 10.7 ± 1.0 bcd        | 33.3 ± 10.1 ab          | 16.4 ± 1.8 abcd   | 3.0 ± 0.1 abc         | 11.2 ± 0.7 cde           | 0.8 ± 0.1 defg        | 1.4 ± 0.4 a            | 3.0 ± 1.2 ab               | 2.9 ± 0.2 ab                   | 7.1 ± 1.3 abc       | 6.1 ± 1.3 bcdef            |
| Tun-Alt-BV-5    | 35.6 ± 2.8 cd     | 6.0 ± 1.0 de       | 26.0 ± 2.2 gh     | 28.6 ± 6.9 a        | 17.2 ± 1.8 efg        | 36.4 ± 9.7 ab           | 19.4 ± 3.3 abcde  | 0.6 ± 0.1 ab          | 3.7 ± 0.3 abc            | 0.5 ± 0.3 cde         | 1.4 ± 0.4 a            | 4.8 ± 1.2 abc              | 13.7 ± 0.6 fghij               | 7.7 ± 1.3 bcdef     | 7.7 ± 1.3 bcdef            |
| Tun-Alt-CC-1    | 30.2 ± 1.7 abcd   | 4.4 ± 0.5 abcde    | 18.6 ± 4.3 bcdef  | 32.8 ± 9.8 a        | 15.7 ± 1.6 defg       | 24.5 ± 7.8 ab           | 11.8 ± 1.0 abcd   | 8.0 ± 1.6 bcde        | 24.3 ± 1.9 hij           | 0.7 ± 0.1 defg        | 0.3 ± 0.2 a            | 9.8 ± 1.0 ef               | 4.1 ± 1.8 abc                  | 11.1 ± 2.6 cdefghi  | 9.3 ± 0.7 cdef             |
| Tun-Ch-MU-3     | 27.0 ± 3.7 abcd   | 6.1 ± 5.3 de       | 20.2 ± 0.6 efg    | 27.3 ± 17.5 a       | 14.8 ± 1.0 cdef       | 32.6 ± 8.9 ab           | 21.1 ± 3.8 bcde   | 2.2 ± 1.1 abc         | 12.5 ± 2.3 def           | 0.8 ± 0.1 defg        | 0.7 ± 0.2 a            | 7.6 ± 1.6 cde              | 3.1 ± 1.0 ab                   | 14.0 ± 1.6 ghj      | 8.0 ± 0.6 bcdef            |
| Tup-Gy-AD-3-MBT | 22.5 ± 4.2 abcd   | 1.0 ± 1.8 abc      | 13.9 ± 1.0 abcd   | 29.6 ± 22.1 a       | 10.6 ± 0.6 bcd        | 28.5 ± 14.9 ab          | 24.6 ± 6.6 defg   | 0.9 ± 0.2 ab          | 5.9 ± 1.7 abcd           | 0.7 ± 0.1 cdefg       | 1.0 ± 0.5 a            | 4.7 ± 2.1 bc               | 4.7 ± 1.3 abc                  | 18.2 ± 2.9 jk       | 8.5 ± 1.8 bcdef            |
| Tup-Gy-AD-6-Pi  | 31.3 ± 6.8 bcd    | 4.3 ± 0.4 abcde    | 18.8 ± 2.8 cdef   | 56.9 ± 8.8 a        | 12.4 ± 1.6 bcdef      | 68.6 ± 5.5 b            | 35.5 ± 1.8 fg     | 0.2 ± 0.2 a           | 4.4 ± 1.5 abcd           | 0.5 ± 0.2 bc          |                        |                            |                                |                     |                            |

**Table S3.** Overall data of anthocyanins and LMW-PCs (Name and PubChem CID) quantified [Mean (mg L<sup>-1</sup>) ± SD] in Malbec wines from different locations of Mendoza obtained in 2018 vintage.

| Location        | Anthocyanins                          |                                 |                                  |                                 |                                 |                                            |                                          |                                         |                                         |                                            |                                             |                                            |                                 |                     |                               |              |
|-----------------|---------------------------------------|---------------------------------|----------------------------------|---------------------------------|---------------------------------|--------------------------------------------|------------------------------------------|-----------------------------------------|-----------------------------------------|--------------------------------------------|---------------------------------------------|--------------------------------------------|---------------------------------|---------------------|-------------------------------|--------------|
|                 | Delphinidin 3-O-glucoside - 102515359 | Cyanidin 3-O-glucoside - 197081 | Petunidin 3-O-glucoside - 443651 | Peonidin 3-O-glucoside - 443654 | Malvidin 3-O-glucoside - 443652 | Delphinidin 3-O-acetylglucoside - 15385440 | Petunidin 3-O-acetylglucoside - 44256961 | Peonidin 3-O-acetylglucoside - 44256967 | Malvidin 3-O-acetylglucoside - 72193646 | Petunidin 3-O-coumaroylglucoside - 9897848 | Peonidin 3-O-coumaroylglucoside - 131752297 | Malvidin 3-O-coumaroylglucoside - 71308234 |                                 |                     |                               |              |
| Parcels         | Luj-Agr-LP-180                        | 13.7 ± 2.7 abc                  | 81.8 ± 3.3 defg                  | 0.4 ± 0.1 cdef                  | 138.5 ± 1.3 efgh                | 843.2 ± 38.8 defg                          | 11.6 ± 8.9 a                             | 10.8 ± 0.9 abcd                         | 3.5 ± 0.3 cd                            | 133.5 ± 10.2 defg                          | 1.3 ± 0.5 ab                                | 11.3 ± 0.9 cdefg                           | 65.6 ± 5.8 cdef                 |                     |                               |              |
|                 | Luj-Ug-FO-1                           | 12.1 ± 8.5 abc                  | 9.7 ± 3.6 a                      | 0.1 ± 0.1 abcd                  | 39.3 ± 6.5 abc                  | 573.5 ± 80.8 abc                           | 7.8 ± 3.1 a                              | 9.8 ± 1.3 abcd                          | 3.3 ± 1.4 bcd                           | 80.7 ± 16.8 ab                             | 7.6 ± 1.3 abc                               | 6.0 ± 1.1 ab                               | 38.9 ± 7.3 ab                   |                     |                               |              |
|                 | Luj-Ug-ZA-1                           | 13.5 ± 0.1 abc                  | 5.1 ± 2.1 a                      | 0.2 ± 0.0 abcdef                | 31.2 ± 2.5 abc                  | 498.9 ± 5.6 abc                            | 12.4 ± 3.5 a                             | 7.7 ± 0.0 ab                            | 2.4 ± 0.6 abc                           | 70.9 ± 0.4 a                               | 6.8 ± 0.4 abc                               | 3.6 ± 0.1 a                                | 38.7 ± 1.1 ab                   |                     |                               |              |
|                 | Mai-Lu-AG-18                          | 10.4 ± 9.0 abc                  | 32.6 ± 14.8 abc                  | 0.2 ± 0.1 abcdef                | 69.7 ± 23.3 bcd                 | 617.9 ± 148.4 abc                          | 16.4 ± 2.4 a                             | 9.7 ± 8.2 abcd                          | 3.3 ± 0.4 bcd                           | 90.7 ± 19.9 abc                            | 12.2 ± 3.0 abc                              | 9.5 ± 2.9 bcd                              | 44.7 ± 14.7 abc                 |                     |                               |              |
|                 | Mai-Lu-AG-20                          | 13.3 ± 3.0 abc                  | 33.1 ± 0.9 abc                   | 0.2 ± 0.2 abcdef                | 73.5 ± 4.2 cd                   | 684.8 ± 47.4 bcd                           | 8.6 ± 5.5 a                              | 16.6 ± 0.7 def                          | 3.2 ± 1.3 bcd                           | 111.3 ± 12.3 bcd                           | 14.5 ± 0.4 bc                               | 12.5 ± 0.9 cdefghi                         | 57.6 ± 2.8 bcd                  |                     |                               |              |
|                 | Riv-Lib-LL-1                          | 9.8 ± 0.9 ab                    | 8.2 ± 9.0 a                      | 0.04 ± 0.0 ab                   | 26.6 ± 1.1 ab                   | 459.8 ± 18.5 a                             | 5.1 ± 1.8 a                              | 6.4 ± 0.5 a                             | 1.3 ± 0.3 abc                           | 62.5 ± 2.5 a                               | 8.1 ± 0.5 abc                               | 3.5 ± 0.3 a                                | 45.8 ± 4.8 ab                   |                     |                               |              |
|                 | Riv-Mir-LV-4                          | 5.6 ± 2.9 a                     | 10.9 ± 0.6 a                     | 0.1 ± 0.0 abc                   | 39.9 ± 2.8 abc                  | 493.1 ± 24.8 ab                            | 6.8 ± 10.1 a                             | 8.2 ± 0.5 abc                           | 4.8 ± 0.1 de                            | 58.1 ± 3.2 a                               | 10.7 ± 0.7 abc                              | 8.5 ± 1.1 bc                               | 59.2 ± 5.0 bcd                  |                     |                               |              |
|                 | Riv-Riv-LA-1                          | 6.7 ± 1.3 a                     | 14.1 ± 2.1 ab                    | 0.01 ± 0.0 ab                   | 17.1 ± 5.6 a                    | 463.8 ± 67.3 a                             | 3.7 ± 1.2 a                              | 4.9 ± 0.9 a                             | 0.7 ± 0.2 a                             | 57.6 ± 11.1 a                              | 4.1 ± 0.8 abc                               | 1.8 ± 0.4 a                                | 25.9 ± 6.2 a                    |                     |                               |              |
|                 | San-Alt-NI-1-Pi                       | 33.6 ± 6.2 defgh                | 145.0 ± 12.9 j                   | 0.5 ± 0.1 f                     | 202.3 ± 15.3 k                  | 1119.9 ± 87.6 h                            | 10.4 ± 4.2 a                             | 23.0 ± 2.5 f                            | 5.1 ± 0.6 de                            | 182.1 ± 16.9 h                             | 4.5 ± 1.4 abc                               | 12.7 ± 0.8 cdefghi                         | 68.6 ± 5.8 ef                   |                     |                               |              |
|                 | San-Alt-NI-1-Pr                       | 16.0 ± 2.1 abcd                 | 66.0 ± 11.3 cde                  | 0.3 ± 0.0 abcdef                | 120.7 ± 10.7 ef                 | 969 ± 4.3 gh                               | 11.1 ± 9.5 a                             | 7.8 ± 2.3 abc                           | 2.7 ± 0.3 abc                           | 157.7 ± 44.3 gh                            | 15.9 ± 0.6 c                                | 10.6 ± 0.7 cdef                            | 53.9 ± 5.0 bcd                  |                     |                               |              |
|                 | San-Alt-NI-2-Pr                       | 28.5 ± 3.7 cdefg                | 118.4 ± 9.6 ghi                  | 0.4 ± 0.2 bcdef                 | 180.1 ± 16.6 hijk               | 1039.4 ± 86.1 gh                           | 7.6 ± 4.7 a                              | 18.8 ± 2.3 ef                           | 4.2 ± 0.8 cde                           | 178.5 ± 22.3 h                             | 1.7 ± 1.6 ab                                | 12.2 ± 1.0 cdefgh                          | 59.6 ± 6.4 bcd                  |                     |                               |              |
|                 | San-Cep-EB-3                          | 20.5 ± 1.4 abcde                | 94.6 ± 6.9 efgh                  | 0.3 ± 0.1 abcdef                | 151.1 ± 5.8 efgh                | 919.5 ± 31.3 efgh                          | 2.2 ± 1.3 a                              | 10.0 ± 0.7 abcd                         | 3.7 ± 0.5 cde                           | 133.3 ± 7.6 defg                           | 0.3 ± 0.1 a                                 | 9.6 ± 0.2 bcde                             | 56.0 ± 4.2 bcd                  |                     |                               |              |
|                 | San-Cep-EC-5                          | 15.2 ± 0.9 abc                  | 96.0 ± 7.3 efgh                  | 0.5 ± 0.2 f                     | 156.5 ± 6.4 efgh                | 911.0 ± 45.6 efgh                          | 1.4 ± 1.0 a                              | 16.9 ± 1.8 def                          | 3.7 ± 0.4 cde                           | 148.3 ± 13.7 efgh                          | 6.9 ± 9.8 abc                               | 11.2 ± 1.4 cdef                            | 54.7 ± 6.0 bcd                  |                     |                               |              |
|                 | Tun-AI-BV-5                           | 26.7 ± 3.4 bcd                  | 97.6 ± 12.2 efgh                 | 0.5 ± 0.2 def                   | 154.8 ± 18.0 efgh               | 983.9 ± 62.4 efgh                          | 12.0 ± 1.2 a                             | 12.0 ± 2.0 abcde                        | 5.2 ± 0.3 de                            | 148.6 ± 7.4 fgh                            | 12.6 ± 9.4 abc                              | 13.8 ± 1.9 efghi                           | 65.5 ± 4.4 cdef                 |                     |                               |              |
|                 | Tun-AI-CC-1                           | 37.9 ± 7.6 efgh                 | 111.6 ± 5.9 efgh                 | 0.5 ± 0.1 f                     | 165.1 ± 4.0 efgh                | 907.6 ± 22.0 efgh                          | 8.5 ± 3.4 a                              | 11.6 ± 0.7 abcde                        | 5.6 ± 1.0 e                             | 124.6 ± 2.6 cdefg                          | 1.7 ± 0.5 ab                                | 15.7 ± 2.2 hi                              | 61.3 ± 4.7 cdef                 |                     |                               |              |
| Tun-Ch-MU-3     | 4.5 ± 1.0 a                           | 51.1 ± 3.4 bcd                  | 0.5 ± 0.1 ef                     | 107.7 ± 6.3 de                  | 831.4 ± 50.4 def                | 14.2 ± 2.5 a                               | 6.6 ± 0.7 a                              | 2.7 ± 0.3 abc                           | 133.8 ± 8.3 defg                        | 12.4 ± 10.1 abc                            | 11.9 ± 1.0 cdefgh                           | 63.0 ± 8.1 cdef                            |                                 |                     |                               |              |
| Tup-Gy-AD-3-MBT | 40.8 ± 5.1 fgh                        | 133.2 ± 3.0 hij                 | 0.2 ± 0.1 abcdef                 | 156.6 ± 13.8 efgh               | 786.2 ± 78.9 cde                | 3.4 ± 2.3 a                                | 10.9 ± 3.1 abcd                          | 4.3 ± 0.4 cde                           | 92.4 ± 16.4 abc                         | 7.4 ± 9.8 abc                              | 12.9 ± 2.1 defghi                           | 56.0 ± 10.5 bcd                            |                                 |                     |                               |              |
| Tup-Gy-AD-6-Pi  | 37.6 ± 1.7 efgh                       | 117.2 ± 6.7 efgh                | 0.3 ± 0.0 abcdef                 | 167.3 ± 2.0 efgh                | 860.0 ± 23.4 defg               | 1.7 ± 1.9 a                                | 14.6 ± 0.6 bcde                          | 3.4 ± 0.7 cd                            | 114.5 ± 3.7 bcd                         | 2.0 ± 0.2 ab                               | 13.8 ± 0.7 defghi                           | 59.5 ± 2.2 bcd                             |                                 |                     |                               |              |
| Tup-Gy-AD-6-Pr  | 47.9 ± 13.7 h                         | 163.0 ± 34.2 j                  | 0.4 ± 0.2 abcdef                 | 199.7 ± 33.0 jk                 | 849.9 ± 75.7 defg               | 7.6 ± 2.8 a                                | 17.0 ± 2.6 def                           | 5.1 ± 0.2 de                            | 110.3 ± 7.7 bcd                         | 4.5 ± 2.5 abc                              | 15.8 ± 1.9 hi                               | 58.0 ± 8.2 bcd                             |                                 |                     |                               |              |
| Tup-Gy-AD-7     | 45.0 ± 9.2 gh                         | 140.0 ± 18.5 j                  | 0.4 ± 0.1 abcdef                 | 185.5 ± 21.8 efgh               | 877.8 ± 40.4 defg               | 8.3 ± 8.1 a                                | 16.4 ± 2.6 def                           | 3.5 ± 1.1 cd                            | 111.9 ± 0.7 bcde                        | 4.2 ± 2.5 abc                              | 15.5 ± 1.5 ghi                              | 67.3 ± 11.8 def                            |                                 |                     |                               |              |
| Tup-Gy-AD-9     | 34.7 ± 4.8 efgh                       | 131.6 ± 11.1 hij                | 0.4 ± 0.1 abcdef                 | 173.8 ± 18.5 efgh               | 899.6 ± 91.3 efgh               | 7.5 ± 5.1 a                                | 15.5 ± 1.9 bcd                           | 5.0 ± 0.7 de                            | 118.6 ± 12.8 cdef                       | 2.0 ± 1.9 ab                               | 14.7 ± 1.6 fghi                             | 56.5 ± 9.1 bcd                             |                                 |                     |                               |              |
| Tup-Gy-GA-3     | 47.8 ± 11.9 h                         | 148.7 ± 29.4 j                  | 0.3 ± 0.1 abcdef                 | 183.0 ± 30.5 hijk               | 895.6 ± 90.3 efgh               | 10.5 ± 9.2 a                               | 16.0 ± 4.6 cdef                          | 3.4 ± 0.5 cd                            | 123.6 ± 16.9 cdefg                      | 6.7 ± 3.7 abc                              | 16.7 ± 1.9 i                                | 77.9 ± 10.5 f                              |                                 |                     |                               |              |
| Tup-SJ-JM-1     | 25.2 ± 1.1 bcd                        | 78.3 ± 2.1 def                  | 0.1 ± 0.1 abcde                  | 130.7 ± 1.8 efgh                | 933.5 ± 11.7 efgh               | 15.1 ± 3.2 a                               | 6.5 ± 0.5 a                              | 2.5 ± 0.4 abc                           | 132.4 ± 6.3 defg                        | 16.0 ± 0.8 c                               | 11.2 ± 0.4 cdefg                            | 58.0 ± 1.6 bcd                             |                                 |                     |                               |              |
| Departments     | Lujan de Cuyo                         | 13.1 ± 0.9 a                    | 32.2 ± 43.0 ab                   | 0.3 ± 0.2 abc                   | 69.7 ± 59.8 ab                  | 638.5 ± 181.1 a                            | 10.6 ± 2.5 a                             | 9.5 ± 1.6 a                             | 3.1 ± 0.6 abc                           | 95.0 ± 33.7 ab                             | 5.2 ± 3.4 a                                 | 7.0 ± 3.9 ab                               | 47.7 ± 15.5 a                   |                     |                               |              |
|                 | Maipu                                 | 11.9 ± 2.0 a                    | 32.9 ± 0.3 ab                    | 0.2 ± 0.0 ab                    | 71.6 ± 2.7 ab                   | 651.4 ± 47.3 ab                            | 12.5 ± 5.5 a                             | 13.1 ± 4.9 a                            | 3.3 ± 0.1 a                             | 101.0 ± 14.6 ab                            | 13.3 ± 1.7 a                                | 11.0 ± 2.1 bc                              | 51.1 ± 9.1 a                    |                     |                               |              |
|                 | Rivadavia                             | 7.4 ± 2.2 a                     | 11.0 ± 3.0 a                     | 0.1 ± 0.0 a                     | 27.9 ± 11.4 a                   | 472.3 ± 18.2 a                             | 5.2 ± 1.6 a                              | 16.5 ± 1.1 a                            | 2.3 ± 2.2 a                             | 59.4 ± 2.7 a                               | 7.7 ± 3.3 a                                 | 4.6 ± 3.5 a                                | 43.6 ± 16.7 a                   |                     |                               |              |
|                 | San Carlos                            | 22.8 ± 8.0 ab                   | 104.0 ± 29.5 c                   | 0.4 ± 0.1 bc                    | 162.1 ± 30.8 c                  | 991.8 ± 88.0 c                             | 6.5 ± 4.5 a                              | 15.3 ± 6.3 a                            | 3.9 ± 0.9 a                             | 160.0 ± 20.5 c                             | 5.9 ± 6.2 a                                 | 11.3 ± 1.3 bc                              | 58.6 ± 6.0 a                    |                     |                               |              |
|                 | Tunuyan                               | 23 ± 17.0 ab                    | 86.8 ± 31.6 bc                   | 0.5 ± 0.0 c                     | 142.5 ± 30.6 bc                 | 907.7 ± 76.3 c                             | 11.6 ± 2.9 a                             | 10.0 ± 3.0 a                            | 4.5 ± 1.6 a                             | 135.7 ± 12.1 bc                            | 8.9 ± 6.2 a                                 | 13.8 ± 1.9 c                               | 63.3 ± 2.1 a                    |                     |                               |              |
| Tupungato       | 39.9 ± 8.2 b                          | 130.3 ± 27.0 c                  | 0.3 ± 0.1 bc                     | 170.9 ± 22.5 c                  | 864.7 ± 63.0 bc                 | 7.7 ± 4.4 a                                | 13.9 ± 3.8 a                             | 3.9 ± 1.0 a                             | 114.8 ± 12.5 b                          | 6.1 ± 4.9 a                                | 14.4 ± 1.9 c                                | 61.9 ± 8.0 a                               |                                 |                     |                               |              |
| Zones           | East zone                             | 7.4 ± 2.2 a                     | 11.0 ± 3.0 a                     | 0.1 ± 0.0 a                     | 27.9 ± 11.4 a                   | 472.3 ± 18.2 a                             | 5.2 ± 1.6 a                              | 6.5 ± 1.6 a                             | 2.3 ± 2.2 a                             | 59.4 ± 2.7 a                               | 7.7 ± 3.3 a                                 | 4.6 ± 3.5 a                                | 43.6 ± 16.7 a                   |                     |                               |              |
|                 | First zone                            | 12.6 ± 1.4 a                    | 32.5 ± 30.4 a                    | 0.2 ± 0.1 ab                    | 70.4 ± 42.3 a                   | 643.7 ± 130.4 b                            | 11.4 ± 3.4 a                             | 10.9 ± 3.4 ab                           | 3.1 ± 2.0 a                             | 97.4 ± 25.1 ab                             | 8.5 ± 5.1 a                                 | 8.6 ± 3.7 a                                | 49.1 ± 12.0 ab                  |                     |                               |              |
|                 | Uco Valley                            | 30.8 ± 12.9 b                   | 112.6 ± 32.1 b                   | 0.4 ± 0.1 bc                    | 162.3 ± 27.3 b                  | 915.6 ± 90.1 c                             | 8.1 ± 4.3 a                              | 13.6 ± 4.8 b                            | 4.0 ± 1.0 a                             | 134.0 ± 25.2 b                             | 6.6 ± 5.3 a                                 | 13.2 ± 2.2 b                               | 61.1 ± 6.5 b                    |                     |                               |              |
| LMW-PCs         |                                       |                                 |                                  |                                 |                                 |                                            |                                          |                                         |                                         |                                            |                                             |                                            |                                 |                     |                               |              |
| Location        | Gallic acid - 370                     | OH-tyrosol - 82755              | Tyrosol - 10393                  | (+)-Catechin - 9064             | Syringic acid - 10742           | (-)-Epicatechin - 72276                    | Astilbin - 119258                        | Caffeic acid - 689043                   | p-coumaric acid - 637542                | Ferulic acid - 445858                      | trans-Piceid - 5281718                      | trans-resveratrol - 445154                 | Quercetin-3-glucoside - 5280404 | Quercetin - 5280343 | (-)-Gallicocatechin - 9882981 |              |
| Parcels         | Luj-Agr-LP-180                        | 19.6 ± 0.7 cdef                 | 1.1 ± 0.2 a                      | 30.2 ± 3.6 e                    | 3.3 ± 1.0 ab                    | 6.9 ± 1.1 g                                | 79.0 ± 6.7 bcd                           | 15.0 ± 4.8 a                            | 8.8 ± 2.0 abc                           | 18.2 ± 2.2 defghi                          | 0.7 ± 0.0 a                                 | 1.6 ± 1.2 a                                | 1.5 ± 1.0 abc                   | 11.6 ± 2.9 cde      | 5.2 ± 0.6 ab                  |              |
|                 | Luj-Ug-FO-1                           | 16.0 ± 0.4 abcdef               | 0.9 ± 0.6 a                      | 6.3 ± 1.0 abc                   | 1.4 ± 1.0 ab                    | 4.3 ± 0.5 abcde                            | 60.8 ± 9.7 abc                           | 20.7 ± 13.8 a                           | 11.1 ± 9.5 ab                           | 24.0 ± 5.5 ghi                             | 0.6 ± 0.1 a                                 | 0.5 ± 0.3 a                                | 3.6 ± 0.8 ab                    | 3.8 ± 1.3 bc        | 4.2 ± 0.6 a                   | 2.8 ± 1.5 ab |
|                 | Luj-Ug-ZA-1                           | 14.9 ± 0.7 abcde                | 0.6 ± 0.1 a                      | 15.9 ± 5.0 abcde                | 1.6 ± 1.4 ab                    | 3.8 ± 0.9 abcde                            | 135.6 ± 47.6 a                           | 17.5 ± 6.8 a                            | 6.5 ± 2.7 ab                            | 29.2 ± 9.6 i                               | 0.5 ± 0.2 a                                 | 0.6 ± 0.2 a                                | 0.7 ± 0.6 a                     | 1.8 ± 1.9 abc       | 3.7 ± 0.5 a                   | 4.7 ± 1.2 ab |
|                 | Mai-Lu-AG-18                          | 18.1 ± 0.8 bcd                  | 0.9 ± 0.2 a                      | 6.5 ± 1.2 abc                   | 1.4 ± 1.1 ab                    | 5.4 ± 0.4 cdefg                            | 60.5 ± 5.6 abc                           | 25.8 ± 4.1 a                            | 3.7 ± 1.5 a                             | 8.7 ± 3.3 abcdef                           | 0.3 ± 0.0 a                                 | 1.5 ± 0.3 ab                               | 2.7 ± 1.3 ab                    | 0.4 ± 0.2 ab        | 8.3 ± 1.0 abcd                | 4.6 ± 1.3 ab |
|                 | Mai-Lu-AG-20                          | 11.5 ± 0.3 ab                   | 3.4 ± 1.8 a                      | 0.9 ± 0.3 a                     | 1.7 ± 1.0 ab                    | 2.7 ± 0.7 ab                               | 44.7 ± 15.4 abc                          | 19.7 ± 6.0 a                            | 2.7 ± 1.9 a                             | 3.5 ± 1.7 ab                               | 0.4 ± 0.2 a                                 | 1.8 ± 0.7 ab                               | 1.1 ± 0.3 a                     | 2.0 ± 1.0 abc       | 7.0 ± 1.8 abcd                | 4.3 ± 0.6 ab |
|                 | Riv-Lib-LL-1                          | 17.8 ± 1.9 bcd                  | 0.5 ± 0.1 a                      | 6.2 ± 2.3 abc                   | 2.1 ± 1.9 ab                    | 4.5 ± 1.1 bcd                              | 58.0 ± 15.3 abc                          | 12.3 ± 2.2 a                            | 26.4 ± 19.8 b                           | 24.2 ± 8.1 h                               | 0.9 ± 0.6 a                                 | 0.5 ± 0.1 a                                | 0.4 ± 0.2 a                     | 2.0 ± 0.9 abc       | 4.2 ± 0.9 a                   | 4.9 ± 2.1 ab |
|                 | Riv-Mir-LV-4                          | 22.8 ± 2.3 f                    | 1.2 ± 0.3 a                      | 8.8 ± 0.5 abc                   | 1.5 ± 0.6 ab                    | 5.6 ± 0.3 defg                             | 91.7 ± 6.2 cde                           | 31.3 ± 8.6 a                            | 16.0 ± 2.8 ab                           | 31.3 ± 2.0 i                               | 0.6 ± 0.0 a                                 | 0.8 ± 0.2 a                                | 5.7 ± 1.0 bc                    | 1.1 ± 1.1 abc       | 9.5 ± 0.9 abcd                | 6.0 ± 0.4 b  |
|                 | Riv-Riv-LA-1                          | 17.1 ± 2.4 bcd                  | 0.5 ± 0.1 a                      | 13.8 ± 2.7 abcd                 | 0.0 a                           | 4.5 ± 0.5 abcdefg                          | 119.0 ± 27.8 de                          | 14.1 ± 3.6 a                            | 59.7 ± 10.5 c                           | 45.0 ± 10.4 j                              | 2.7 ± 0.8 b                                 | 0.8 ± 0.1 a                                | 1.0 ± 0.4 a                     | 1.9 ± 0.7 abc       | 4.6 ± 0.7 ab                  | 3.7 ± 0.7 ab |
|                 | San-Alt-NI-1-Pi                       | 14.9 ± 5.0 abcd                 | 0.8 ± 0.5 a                      | 16.8 ± 3.1 abcde                | 1.6 ± 1.0 ab                    | 5.6 ± 0.6 defg                             | 51.3 ± 3.2 abc                           | 23.3 ± 14.9 a                           | 4.2 ± 0.9 a                             | 15.2 ± 1.2 bcd                             | 0.6 ± 0.0 a                                 | 0.4 ± 0.3 a                                | 1.3 ± 0.7 a                     | 1.5 ± 0.9 abc       | 7.8 ± 1.8 abcd                | 3.1 ± 0.3 ab |
|                 | San-Alt-NI-1-Pr                       | 15.2 ± 1.5 abcde                | 1.1 ± 0.3 a                      | 9.8 ± 3.9 abcd                  | 1.2 ± 1.1 a                     | 4.3 ± 0.9 abcde                            | 62.2 ± 6.1 abc                           | 27.3 ± 9.2 a                            | 5.8 ± 1.1 a                             | 21.6 ± 4.4 efghi                           | 0.6 ± 0.1 a                                 | 0.4 ± 0.1 a                                | 3.2 ± 1.0 abc                   | 3.5 ± 2.8 abc       | 6.6 ± 1.0 abc                 | 3.4 ± 1.2 ab |
|                 | San-Alt-NI-2-Pr                       | 17.4 ± 1.1 bcd                  | 1.2 ± 0.3 ab                     | 18.7 ± 8.2 cde                  | 2.4 ± 2.3 abc                   | 6.8 ± 1.2 fgh                              | 64.0 ± 13.6 abc                          | 32.6 ± 3.4 a                            | 5.4 ± 1.5 a                             | 18.2 ± 4.4 defghi                          | 0.8 ± 0.1 a                                 | 0.7 ± 0.1 a                                | 1.6 ± 0.5 abc                   | 3.9 ± 2.9 bc        | 10.0 ± 2.2 abcde              | 3.9 ± 0.6 ab |
|                 | San-Cep-EB-3                          | 16.5 ± 2.1 abcdef               | 1.1 ± 0.6 a                      | 5.6 ± 0.5 abc                   | 2.8 ± 0.9 ab                    | 5.5 ± 1.0 defg                             | 47.7 ± 5.6 abc                           | 22.0 ± 9.8 a                            | 10.3 ± 6.3 ab                           | 17.9 ± 3.6 cdefghi                         | 0.5 ± 0.1 a                                 | 0.5 ± 0.2 a                                | 0.8 ± 0.3 a                     | 1.4 ± 0.4 abc       | 9.2 ± 2.5 abcd                | 2.9 ± 0.8 ab |
|                 | San-Cep-EC-5                          | 22.2 ± 1.5 ef                   | 1.2 ± 0.5 a                      | 23.5 ± 1.7 de                   | 2.1 ± 0.6 ab                    | 6.6 ± 0.5 efgh                             | 64.6 ± 8.6 abc                           | 30.8 ± 8.2 a                            | 8.1 ± 1.2 ab                            | 14.0 ± 1.2 abcdefgh                        | 0.6 ± 0.1 a                                 | 0.6 ± 0.1 a                                | 1.2 ± 0.2 a                     | 0.8 ± 0.2 ab        | 7.9 ± 1.0 abcd                | 4.0 ± 0.9 ab |
|                 | Tun-AI-BV-5                           | 14.3 ± 1.2 abc                  | 0.9 ± 0.2 a                      | 3.8 ± 1.5 ab                    | 1.5 ± 0.6 ab                    | 3.6 ± 0.9 abcde                            | 48.3 ± 14.3 abc                          | 15.6 ± 5.2 a                            | 2.7 ± 0.7 a                             | 6.5 ± 1.2 abcde                            | 0.3 ± 0.1 a                                 | 0.6 ± 0.1 a                                | 2.0 ± 1.2 abc                   | 1.3 ± 0.3 abc       | 7.8 ± 3.0 abcd                | 4.0 ± 1.3 ab |
|                 | Tun-AI-CC-1                           | 19.9 ± 0.4 def                  | 3.1 ± 0.8 b                      | 17.9 ± 12.5 bcde                | 1.3 ± 0.8 a                     | 5.3 ± 0.3 cdefg                            | 88.7 ± 13.2 cde                          | 32.0 ± 4.6 abc                          | 15.7 ± 4.4 ab                           | 19.5 ± 1.8 efghi                           | 0.6 ± 0.2 a                                 | 1.7 ± 0.5 ab                               | 9.1 ± 4.8 c                     | 4.8 ± 0.8 c         | 18.4 ± 4.0 f                  | 5.2 ± 1.5 ab |
| Tun-Ch-MU-3     | 12.9 ± 2.5 abc                        | 1.2 ± 0.7 a                     | 12.9 ± 3.9 abcd                  | 1.8 ± 1.8 ab                    | 3.4 ± 0.4 abcde                 | 72.8 ± 6.4 abcd                            | 24.8 ± 7.5 a                             | 12.3 ± 15.5 ab                          | 10.6 ± 4.3 abcdefg                      | 0.3 ± 0.1 a                                | 0.8 ± 0.3 a                                 | 2.2 ± 2.3 ab                               | 2.7 ± 1.2 abc                   | 10.9 ± 1.3 bcde     | 4.0 ± 0.4 ab                  |              |
| Tup-Gy-AD-3-MBT | 14.0 ± 2.1 abcd                       | 1.0 ± 0.3 a                     | 3.0 ± 2.1 a                      | 2.7 ± 1.7 ab                    | 3.5 ± 0.2 abcde                 | 32.4 ± 5.0 abc                             | 12.7 ± 4.0 a                             | 1.2 ± 0.4 a                             | 1.5 ± 0.6 a                             | 0.2 ± 0.0 a                                | 2.0 ± 0.6 ab                                | 1.8 ± 0.8 abc                              | 0.1 ± 0.2 ab                    | 12.7 ± 3.0 cdef     | 4.7 ± 1.3 ab                  |              |
| Tup-Gy-AD-6-Pi  | 12.1 ± 1.6 ab                         | 1.5 ± 1.0 ab                    | 23.2 ± 6.6 de                    | 5.0 ± 1.8 b                     | 4.0 ± 0.3 abcde                 | 57.5 ± 3.7 abc                             | 20.7 ± 9.9 a                             | 3.9 ± 3.9 a                             | 2.6 ± 1.5 ab                            | 0.4 ± 0.0 a                                | 2.0 ± 1.0 ab                                | 1.7 ± 0.5 ab                               | 1.5 ± 0.8 abc                   | 9.6 ± 1.5 abcd      | 2.7 ± 0.8 a                   |              |
| Tup-Gy-AD-6-Pr  |                                       |                                 |                                  |                                 |                                 |                                            |                                          |                                         |                                         |                                            |                                             |                                            |                                 |                     |                               |              |

**Table S4.** One-way ANOVA results for the 21 PCs (Name and PubChem CID) showing significant differences ( $p$ -value $\leq$  0.05) in Malbec wines from different locations of Mendoza during different

| Anthocyanins |                                       |                                 |                                  |                                 |                                 |                                            |                                          |                                         |                                         |                                              |                                               |                                              |                                 |                     |                             |
|--------------|---------------------------------------|---------------------------------|----------------------------------|---------------------------------|---------------------------------|--------------------------------------------|------------------------------------------|-----------------------------------------|-----------------------------------------|----------------------------------------------|-----------------------------------------------|----------------------------------------------|---------------------------------|---------------------|-----------------------------|
| Vintage      | Delphinidin 3-O-glucoside - 102515359 | Cyanidin 3-O-glucoside - 197081 | Petunidin 3-O-glucoside - 443651 | Peonidin 3-O-glucoside - 443654 | Malvidin 3-O-glucoside - 443652 | Delphinidin 3-O-acetylglucoside - 15385440 | Petunidin 3-O-acetylglucoside - 44256961 | Peonidin 3-O-acetylglucoside - 44256847 | Malvidin 3-O-acetylglucoside - 72193646 | Petunidin 3-O-p-coumaroylglucoside - 9897848 | Peonidin 3-O-p-coumaroylglucoside - 131752297 | Malvidin 3-O-p-coumaroylglucoside - 71308234 |                                 |                     |                             |
| 2016         | 27.9 a                                | 3.2 b                           | 40.1 a                           | 15.1 b                          | 315.9 b                         | 8.0 a                                      | 8.9 a                                    | 4.5 ab                                  | 28.1 c                                  | 6 b                                          | 6.5 b                                         | 16.0 c                                       |                                 |                     |                             |
| 2017         | 38.6 a                                | 90.8 a                          | 7.4 b                            | 132.3 a                         | 746.7 a                         | 9.3 a                                      | 11.8 a                                   | 6.0 a                                   | 93.1 b                                  | 10.1 a                                       | 10.4 a                                        | 42.7 b                                       |                                 |                     |                             |
| 2018         | 23.7 a                                | 82.1 a                          | 0.3 b                            | 124.8 a                         | 798.6 a                         | 8.4 a                                      | 12.1 a                                   | 3.6 b                                   | 116.3 a                                 | 7.1 ab                                       | 11.1 a                                        | 56.2 a                                       |                                 |                     |                             |
| LMW-PCs      |                                       |                                 |                                  |                                 |                                 |                                            |                                          |                                         |                                         |                                              |                                               |                                              |                                 |                     |                             |
| Vintage      | Gallic acid - 370                     | OH-tyrosol - 82755              | Tyrosol - 10393                  | (+)-Catechin - 9064             | Syringic acid - 10742           | (-)-Epicatechin - 72276                    | Astilbin - 119258                        | Caffeic acid - 689043                   | <i>p</i> - coumaric acid - 637542       | Ferulic acid - 445858                        | <i>trans</i> - Piceid - 5281718               | <i>trans</i> - resveratrol - 445154          | Quercetin-3-glucoside - 5280804 | Quercetin - 5280343 | (-)- Galocatechin - 9882981 |
| 2016         | 23 b                                  | 2.6 a                           | 33.1 a                           | 25.2 b                          | 13.8 a                          | 20.4 b                                     | 6.2 b                                    | 9.6 a                                   | 19.1 a                                  | 1.2 a                                        | 2.6 a                                         | 6.0 a                                        | 0.7 c                           | 9.4 a               | 14.0 a                      |
| 2017         | 28.3 a                                | 2.8 a                           | 17.8 b                           | 31.8 a                          | 13.2 a                          | 32.5 b                                     | 18.9 a                                   | 7.5 a                                   | 17.2 a                                  | 0.6 b                                        | 0.9 b                                         | 5.3 a                                        | 3.9 a                           | 11.4 a              | 8.0 b                       |
| 2018         | 15.8 c                                | 1.1 b                           | 11.1 c                           | 2.0 c                           | 4.5 b                           | 62.4 a                                     | 20.9 a                                   | 9.6 a                                   | 14.5 a                                  | 0.6 b                                        | 1.1 b                                         | 2.3 b                                        | 1.8 b                           | 8.9 a               | 3.9 c                       |

Different letters within the same row indicate significant differences ( $p < 0.05$ ) according to a Tukey HSD test.

**Table S5.** Confusion matrix using PLS-DA with the 66% of data to train and 33% to test the model

| Vintages | 2016 | 2017 | 2018 |
|----------|------|------|------|
| 2016     | 8    | 0    | 0    |
| 2017     | 0    | 8    | 0    |
| 2018     | 0    | 0    | 7    |

**Table S6.** TerraClimate data obtained from location of the parcels

| Locations |            |               |             | Mean minimum temperature (°C) |          |          |         |          |       |       |         | Mean maximum temperature (°C) |          |         |          |       |       |                                        |      | 1-Oct to 30-April |  |  |
|-----------|------------|---------------|-------------|-------------------------------|----------|----------|---------|----------|-------|-------|---------|-------------------------------|----------|---------|----------|-------|-------|----------------------------------------|------|-------------------|--|--|
| Vintage   | Zones      | Departments   | GIs         | October                       | November | December | January | February | March | April | October | November                      | December | January | February | March | April | days with ><br>33 ° Celsius<br>degrees | GDD  | Rainfall<br>(mm)  |  |  |
| 2016      | First Zone | Lujan de Cuyo | Agrelo      | 6.2                           | 10.3     | 14.2     | 16.8    | 16.0     | 11.7  | 7.1   | 16.7    | 23.1                          | 28.6     | 28.8    | 30.5     | 25.9  | 18.2  | 15                                     | 1755 | 423               |  |  |
|           |            |               | Ugarteche   | 5.0                           | 9.6      | 14.2     | 15.7    | 15.6     | 10.5  | 6.5   | 20.2    | 24.5                          | 29.9     | 29.9    | 30.6     | 26.3  | 19.5  | NA                                     | 1795 | 330               |  |  |
|           |            | Maipu         | Lunlunta    | 7.2                           | 11.7     | 16.1     | 17.7    | 17.7     | 13.4  | 8.7   | 17.7    | 24.2                          | 29.8     | 29.7    | 30.9     | 26.4  | 19.0  | 22                                     | 1952 | 551               |  |  |
|           |            |               | El Mirador  | 6.8                           | 11.8     | 16.4     | 18.1    | 18.1     | 13.1  | 8.4   | 22.0    | 26.5                          | 31.9     | 31.7    | 32.1     | 27.6  | 20.3  | NA                                     | 2203 | 282               |  |  |
|           | East Zone  | Rivadavia     | La Libertad | 7.9                           | 11.4     | 15.5     | 17.9    | 17.4     | 12.5  | 7.5   | 19.3    | 26.3                          | 32.0     | 31.1    | 32.3     | 28.1  | 19.7  | 38                                     | 2049 | 571               |  |  |
|           |            |               | Rivadavia   | 6.9                           | 11.7     | 16.3     | 18.0    | 18.0     | 13.3  | 8.5   | 21.8    | 25.9                          | 31.3     | 31.0    | 31.6     | 27.3  | 20.1  | NA                                     | 2155 | 271               |  |  |
|           |            | San Carlos    | Altamira    | 6.5                           | 9.6      | 13.0     | 15.7    | 15.0     | 11.4  | 6.7   | 15.7    | 23.3                          | 29.2     | 29.1    | 30.1     | 25.9  | 17.9  | 17                                     | 1640 | 605               |  |  |
|           |            |               | El Cepillo  | 5.6                           | 9.2      | 12.8     | 15.7    | 14.8     | 11.0  | 6.5   | 15.3    | 22.8                          | 28.0     | 28.1    | 29.3     | 25.3  | 17.5  | 10                                     | 1591 | 769               |  |  |
|           | Uco Valley | Tunuyan       | Chacayes    | 5.6                           | 9.4      | 13.2     | 15.8    | 14.9     | 11.3  | 6.7   | 16.0    | 22.6                          | 27.4     | 27.4    | 28.9     | 24.9  | 17.7  | 7                                      | 1603 | 695               |  |  |
|           |            |               | Los Árboles | 3.8                           | 8.1      | 12.7     | 14.3    | 13.9     | 9.4   | 5.3   | 19.4    | 23.6                          | 29.1     | 29.4    | 30.1     | 26.1  | 19.4  | NA                                     | 1590 | 331               |  |  |
|           |            | Tupungato     | Gualtallary | 3.9                           | 7.9      | 11.9     | 14.2    | 13.5     | 10.4  | 5.4   | 12.4    | 19.9                          | 25.5     | 25.3    | 25.6     | 22.4  | 14.7  | 1                                      | 1225 | 716               |  |  |
|           |            |               | San José    | 6.0                           | 9.5      | 14.0     | 16.4    | 15.6     | 11.9  | 7.1   | 15.3    | 22.8                          | 29.5     | 28.9    | 30.0     | 25.6  | 17.3  | 13                                     | 1653 | 725               |  |  |
| 2017      | First Zone | Lujan de Cuyo | Agrelo      | 7.1                           | 10.1     | 13.3     | 16.0    | 15.4     | 11.8  | 8.6   | 22.1    | 26.6                          | 31.0     | 33.9    | 31.2     | 27.1  | 21.2  | 38                                     | 1939 | 335               |  |  |
|           |            |               | Ugarteche   | 7.9                           | 11.2     | 14.1     | 16.7    | 15.4     | 11.7  | 7.7   | 23.5    | 28.2                          | 31.2     | 33.4    | 31.0     | 26.9  | 21.8  | NA                                     | 2129 | 230               |  |  |
|           |            | Maipu         | Lunlunta    | 8.9                           | 11.8     | 14.7     | 18.0    | 16.7     | 13.6  | 10.3  | 22.7    | 27.5                          | 30.4     | 33.1    | 30.9     | 27.1  | 21.2  | 37                                     | 2185 | 279               |  |  |
|           |            |               | El Mirador  | 9.6                           | 12.9     | 15.7     | 17.3    | 16.1     | 12.6  | 9.0   | 25.5    | 30.5                          | 33.7     | 36.7    | 34.3     | 30.4  | 24.0  | 85                                     | 2491 | 319               |  |  |
|           | East Zone  | Rivadavia     | La Libertad | 9.6                           | 12.9     | 15.3     | 17.2    | 17.2     | 14.5  | 10.4  | 25.5    | 30.5                          | 33.9     | 37.6    | 33.8     | 29.0  | 22.9  | 80                                     | 2496 | 183               |  |  |
|           |            |               | Rivadavia   | 8.5                           | 10.8     | 14.1     | 17.4    | 16.5     | 13.2  | 10.1  | 26.0    | 30.9                          | 34.3     | 38.5    | 35.4     | 31.1  | 24.7  | 96                                     | 2459 | 287               |  |  |
|           |            | San Carlos    | Altamira    | 6.5                           | 9.1      | 11.9     | 14.5    | 14.2     | 10.2  | 7.4   | 21.4    | 26.3                          | 29.7     | 33.4    | 30.1     | 26.7  | 20.2  | 34                                     | 1846 | 478               |  |  |
|           |            |               | El Cepillo  | 4.8                           | 7.7      | 10.7     | 13.3    | 14.3     | 12.1  | 8.5   | 21.0    | 25.6                          | 29.5     | 32.6    | 29.3     | 25.7  | 19.7  | 27                                     | 1797 | 541               |  |  |
|           | Uco Valley | Tunuyan       | Chacayes    | 6.3                           | 8.5      | 11.8     | 14.0    | 14.1     | 9.8   | 7.1   | 21.0    | 25.3                          | 28.5     | 31.6    | 28.7     | 25.9  | 19.9  | 20                                     | 1806 | 379               |  |  |
|           |            |               | Los Árboles | 6.4                           | 9.4      | 12.3     | 14.6    | 13.3     | 9.6   | 6.2   | 22.1    | 27.3                          | 30.5     | 32.8    | 30.6     | 26.6  | 21.6  | NA                                     | 1866 | 250               |  |  |
|           |            | Tupungato     | Gualtallary | 4.1                           | 6.8      | 9.6      | 12.3    | 13.3     | 11.2  | 7.9   | 18.1    | 23.1                          | 26.4     | 30.0    | 26.8     | 23.7  | 17.3  | 7                                      | 1438 | 368               |  |  |
|           |            |               | San José    | 7.0                           | 10.3     | 12.9     | 15.7    | 15.1     | 11.8  | 8.0   | 21.6    | 27.1                          | 31.2     | 34.3    | 30.8     | 26.8  | 20.4  | 42                                     | 1952 | 408               |  |  |
| 2018      | First Zone | Lujan de Cuyo | Agrelo      | 5.4                           | 10.2     | 14.3     | 15.5    | 14.9     | 8.7   | 8.1   | 24.6    | 28.1                          | 30.0     | 32.0    | 31.5     | 28.6  | 24.6  | 39                                     | 2028 | 162               |  |  |
|           |            |               | Ugarteche   | 7.3                           | 11.5     | 14.7     | 15.1    | 14.9     | 10.0  | 9.2   | 24.6    | 28.4                          | 31.1     | 31.5    | 31.1     | 28.0  | 23.8  | NA                                     | 2138 | 140               |  |  |
|           |            | Maipu         | Lunlunta    | 8.2                           | 12.1     | 15.8     | 16.7    | 16.2     | 11.6  | 10.3  | 24.1    | 27.8                          | 29.9     | 30.6    | 30.6     | 28.2  | 25.0  | 26                                     | 2184 | 195               |  |  |
|           |            |               | El Mirador  | 5.9                           | 10.3     | 15.2     | 15.9    | 15.4     | 7.6   | 8.6   | 26.9    | 31.0                          | 33.4     | 34.6    | 33.6     | 31.8  | 28.0  | 90                                     | 2433 | 240               |  |  |
|           | East Zone  | Rivadavia     | La Libertad | 6.9                           | 11.2     | 15.5     | 16.2    | 15.5     | 9.2   | 9.3   | 25.8    | 30.7                          | 32.9     | 33.9    | 33.0     | 30.2  | 26.1  | 70                                     | 2321 | 124               |  |  |
|           |            |               | Rivadavia   | 7.2                           | 11.2     | 15.4     | 16.2    | 15.3     | 9.4   | 9.3   | 27.6    | 30.7                          | 33.6     | 35.2    | 34.0     | 31.4  | 27.4  | 92                                     | 2389 | 130               |  |  |
|           |            | San Carlos    | Altamira    | 5.1                           | 9.0      | 13.2     | 14.0    | 13.2     | 7.9   | 7.1   | 23.5    | 27.5                          | 29.7     | 31.1    | 30.8     | 28.4  | 24.2  | 33                                     | 1882 | 116               |  |  |
|           |            |               | El Cepillo  | 4.4                           | 8.4      | 12.8     | 13.8    | 13.1     | 7.4   | 7.0   | 22.8    | 26.4                          | 28.6     | 29.9    | 29.0     | 27.0  | 23.3  | 9                                      | 1794 | 202               |  |  |
|           | Uco Valley | Tunuyan       | Chacayes    | 4.2                           | 8.7      | 13.2     | 14.1    | 13.1     | 7.0   | 7.1   | 23.1    | 26.5                          | 28.6     | 29.6    | 29.3     | 27.1  | 23.7  | 14                                     | 1850 | 73                |  |  |
|           |            |               | Los Árboles | 5.7                           | 9.6      | 13.0     | 13.1    | 12.9     | 8.0   | 7.6   | 23.2    | 27.3                          | 30.3     | 31.1    | 30.7     | 27.8  | 23.6  | NA                                     | 1874 | 146               |  |  |
|           |            | Tupungato     | Gualtallary | 4.3                           | 8.2      | 12.2     | 13.1    | 12.4     | 7.5   | 6.2   | 20.4    | 24.2                          | 26.2     | 26.7    | 26.3     | 24.7  | 21.0  | 2                                      | 1432 | 216               |  |  |
|           |            |               | San José    | 6.2                           | 10.3     | 14.4     | 15.1    | 14.6     | 9.3   | 8.4   | 23.7    | 27.8                          | 30.3     | 31.3    | 30.8     | 28.2  | 23.7  | 34                                     | 1965 | 162               |  |  |



**Table S7.** Chemical characteristics [Mean ± SD] of must and wines from different locations of Mendoza.

| Locations  |               |                 | Must analysis   |         |        |      |                                                 |                                            | Wine Analysis       |                                                 |             |                                                  |                                     |                                                               |                                                 |
|------------|---------------|-----------------|-----------------|---------|--------|------|-------------------------------------------------|--------------------------------------------|---------------------|-------------------------------------------------|-------------|--------------------------------------------------|-------------------------------------|---------------------------------------------------------------|-------------------------------------------------|
| Zones      | Departments   | IGs             | Parcels         | Vintage | ° Brix | pH   | Total acidity (g L <sup>-1</sup> tartaric acid) | Number of replicates of microvinifications | Alcohol level % v/v | Total acidity (g L <sup>-1</sup> tartaric acid) | pH          | Volatile acidity (g L <sup>-1</sup> acetic acid) | Residual sugar (g L <sup>-1</sup> ) | Color intensity (Absorbance at 420 nm + Absorbance at 520 nm) | Hue (Absorbance at 420 nm/Absorbance at 520 nm) |
| First Zone | Lujan de Cuyo | Agreglo         | Luj-Agr-LP-1-80 | 2016    | 23.0   | 3.59 | 7.7                                             | 3                                          | 13.4 ± 0.1          | 6.3 ± 0.1                                       | 3.67 ± 0.14 | 0.47 ± 0.11                                      | 0.1 ± 0.1                           | 11.94 ± 1.83                                                  | 0.61 ± 0.8                                      |
|            |               |                 |                 | 2017    | 24.0   | 3.59 | 5.8                                             | 2                                          | 14.2 ± 0.1          | 4.9 ± 0.1                                       | 3.72 ± 0.02 | 0.53 ± 0.10                                      | 3.0 ± 0.1                           | 9.42 ± 0.78                                                   | 0.47 ± 0.01                                     |
|            |               |                 |                 | 2018    | 24.6   | 3.61 | 5.1                                             | 3                                          | 14.1 ± 0.2          | 6.3 ± 0.4                                       | 3.53 ± 0.03 | 0.79 ± 0.23                                      | 2.9 ± 0.1                           | 16.24 ± 1.17                                                  | 0.58 ± 0.01                                     |
|            |               | Ugarteche       | Luj-Ug-FO-1     | 2016    | 23.4   | 3.46 | 7.7                                             | 3                                          | 13.8 ± 0.5          | 4.9 ± 0.1                                       | 3.58 ± 0.01 | 0.46 ± 0.04                                      | 0.5 ± 0.2                           | 13.71 ± 1.06                                                  | 0.55 ± 0.01                                     |
|            |               |                 |                 | 2017    | 24.6   | 3.83 | 4.3                                             | 3                                          | 14.7 ± 0.3          | 4.8 ± 0.4                                       | 3.73 ± 0.04 | 0.46 ± 0.04                                      | 1.1 ± 0.6                           | 10.86 ± 0.31                                                  | 0.47 ± 0.01                                     |
|            |               |                 |                 | 2018    | 26.0   | 3.69 | 4.5                                             | 3                                          | 14.6 ± 0.3          | 5.7 ± 0.4                                       | 3.55 ± 0.01 | 0.75 ± 0.10                                      | 2.0 ± 1.0                           | 9.52 ± 0.79                                                   | 0.66 ± 0.01                                     |
|            | Maipu         | Lunlunta        | Luj-Ug-ZA-1     | 2016    | 21.0   | 3.62 | 7.8                                             | 3                                          | 11.5 ± 0.2          | 4.9 ± 0.1                                       | 3.48 ± 0.03 | 0.37 ± 0.05                                      | 0.4 ± 0.1                           | 8.65 ± 0.85                                                   | 0.56 ± 0.01                                     |
|            |               |                 |                 | 2017    | 21.0   | 3.97 | 3.7                                             | 2                                          | 12.3 ± 0.1          | 5.0 ± 0.6                                       | 3.77 ± 0.05 | 0.53 ± 0.23                                      | 2.2 ± 0.3                           | 10.32 ± 0.76                                                  | 0.47 ± 0.01                                     |
|            |               |                 |                 | 2018    | 23.6   | 3.68 | 4.5                                             | 3                                          | 12.9 ± 0.1          | 6.6 ± 0.5                                       | 3.58 ± 0.01 | 0.97 ± 0.03                                      | 3.9 ± 0.9                           | 9.49 ± 0.70                                                   | 0.66 ± 0.00                                     |
|            |               | Lunlunta        | Mai-Lu-AG-18    | 2016    | 23.0   | 3.72 | 5.9                                             | 3                                          | 12.7 ± 0.4          | 5.4 ± 0.4                                       | 3.63 ± 0.02 | 0.63 ± 0.04                                      | 0.2 ± 0.1                           | 12.07 ± 2.01                                                  | 0.56 ± 0.03                                     |
|            |               |                 |                 | 2017    | 24.0   | 3.38 | 6.3                                             | 3                                          | 14.4 ± 0.1          | 4.8 ± 0.2                                       | 3.67 ± 0.09 | 0.49 ± 0.12                                      | 2.9 ± 0.1                           | 10.05 ± 2.41                                                  | 0.47 ± 0.03                                     |
|            |               |                 |                 | 2018    | 24.2   | 3.85 | 3.9                                             | 3                                          | 14.2 ± 0.4          | 5.1 ± 0.2                                       | 3.57 ± 0.02 | 0.66 ± 0.23                                      | 2.1 ± 0.1                           | 11.84 ± 0.96                                                  | 0.60 ± 0.02                                     |
| Rivadavia  | Riv-Lib-LL-1  | 2016            | 24.6            | 3.59    | 5.7    | 3    | 14.3 ± 0.3                                      | 5.2 ± 0.4                                  | 3.55 ± 0.10         | 0.46 ± 0.06                                     | 2.3 ± 1.1   | 18.46 ± 1.31                                     | 0.54 ± 0.01                         |                                                               |                                                 |
|            |               | 2017            | 23.6            | 3.75    | 5.2    | 3    | 14.4 ± 0.2                                      | 4.9 ± 0.1                                  | 3.69 ± 0.06         | 0.50 ± 0.06                                     | 2.9 ± 0.2   | 8.47 ± 0.98                                      | 0.49 ± 0.02                         |                                                               |                                                 |
|            |               | 2018            | 25.4            | 3.81    | 3.8    | 3    | 15.1 ± 0.3                                      | 5.4 ± 0.2                                  | 3.53 ± 0.06         | 0.61 ± 0.05                                     | 2.0 ± 0.5   | 10.22 ± 0.39                                     | 0.61 ± 0.01                         |                                                               |                                                 |
|            | Rivadavia     | Riv-Riv-LA-1    | 2016            | 22.6    | 3.80   | 5.8  | 3                                               | 12.7 ± 0.5                                 | 4.7 ± 0.3           | 3.67 ± 0.02                                     | 0.82 ± 0.17 | 0.6 ± 0.1                                        | 7.91 ± 0.56                         | 0.66 ± 0.02                                                   |                                                 |
|            |               |                 | 2017            | 21.6    | 3.75   | 4.1  | 3                                               | 13.1 ± 0.1                                 | 4.8 ± 0.2           | 3.80 ± 0.04                                     | 0.50 ± 0.06 | 2.3 ± 0.5                                        | 8.00 ± 0.25                         | 0.52 ± 0.01                                                   |                                                 |
|            |               |                 | 2018            | 24.4    | 3.95   | 4.0  | 3                                               | 14.9 ± 0.3                                 | 4.9 ± 0.3           | 3.63 ± 0.08                                     | 0.54 ± 0.03 | 2.4 ± 0.6                                        | 9.30 ± 0.68                         | 0.66 ± 0.02                                                   |                                                 |
| East Zone  | Rivadavia     | Riv-Lib-LL-1    | 2016            | 24.6    | 3.79   | 5.7  | 3                                               | 14.8 ± 0.4                                 | 5.2 ± 0.5           | 3.88 ± 0.15                                     | 0.82 ± 0.08 | 3.9 ± 2.4                                        | 9.49 ± 0.78                         | 0.72 ± 0.02                                                   |                                                 |
|            |               |                 | 2017            | 24.0    | 3.38   | 6.3  | 3                                               | 13.4 ± 0.4                                 | 5.7 ± 0.6           | 3.76 ± 0.02                                     | 0.67 ± 0.09 | 1.2 ± 0.5                                        | 7.58 ± 0.63                         | 0.52 ± 0.01                                                   |                                                 |
|            |               |                 | 2018            | 24.4    | 3.83   | 4.5  | 3                                               | 13.7 ± 0.1                                 | 5.7 ± 0.1           | 3.61 ± 0.05                                     | 0.91 ± 0.09 | 2.6 ± 0.7                                        | 6.91 ± 0.21                         | 0.72 ± 0.01                                                   |                                                 |
|            |               | Rivadavia       | Riv-Riv-LA-1    | 2016    | 21.6   | 3.79 | 5.7                                             | 3                                          | 12.7 ± 0.4          | 6.8 ± 0.3                                       | 3.73 ± 0.02 | 0.79 ± 0.11                                      | 1.7 ± 1.5                           | 6.95 ± 0.07                                                   | 0.71 ± 0.01                                     |
|            |               |                 |                 | 2017    | 22.6   | 3.80 | 5.4                                             | 3                                          | 13.1 ± 0.2          | 5.1 ± 0.5                                       | 3.72 ± 0.11 | 0.75 ± 0.12                                      | 2.2 ± 0.3                           | 4.23 ± 0.25                                                   | 0.62 ± 0.03                                     |
|            |               |                 |                 | 2018    | 24.2   | 3.91 | 4.2                                             | 3                                          | 13.4 ± 0.1          | 6.0 ± 0.2                                       | 3.61 ± 0.03 | 1.16 ± 0.30                                      | 1.5 ± 0.1                           | 5.93 ± 0.37                                                   | 0.76 ± 0.01                                     |
|            | Altamira      | San-Ait-NI-1-Pi | 2016            | 22.6    | 3.64   | 6.9  | 2                                               | 13.7 ± 0.1                                 | 5.3 ± 0.3           | 3.65 ± 0.04                                     | 0.45 ± 0.12 | 0.4 ± 0.5                                        | 12.80 ± 0.24                        | 0.53 ± 0.01                                                   |                                                 |
|            |               |                 | 2017            | 25.0    | 3.58   | 4.3  | 3                                               | 14.7 ± 0.3                                 | 5.1 ± 0.2           | 3.70 ± 0.02                                     | 0.50 ± 0.02 | 3.1 ± 0.2                                        | 14.00 ± 0.91                        | 0.50 ± 0.01                                                   |                                                 |
|            |               |                 | 2018            | 23.2    | 3.46   | 4.9  | 3                                               | 14.3 ± 0.0                                 | 5.7 ± 0.1           | 3.52 ± 0.20                                     | 0.60 ± 0.08 | 2.5 ± 0.1                                        | 18.06 ± 0.77                        | 0.57 ± 0.01                                                   |                                                 |
|            |               | San Carlos      | San-Ait-NI-1-Pr | 2016    | 22.6   | 3.57 | 7.1                                             | 3                                          | 12.7 ± 0.1          | 4.9 ± 0.1                                       | 3.56 ± 0.02 | 0.61 ± 0.03                                      | 0.5 ± 0.4                           | 6.37 ± 0.10                                                   | 0.62 ± 0.02                                     |
|            |               |                 |                 | 2017    | 25.0   | 3.63 | 5.2                                             | 3                                          | 15.1 ± 0.2          | 5.3 ± 0.1                                       | 3.65 ± 0.06 | 0.53 ± 0.06                                      | 1.9 ± 0.4                           | 11.56 ± 0.76                                                  | 4.19 ± 0.08                                     |
|            |               |                 |                 | 2018    | 24.8   | 3.44 | 5.3                                             | 3                                          | 13.8 ± 0.1          | 5.2 ± 0.2                                       | 3.58 ± 0.05 | 0.55 ± 0.07                                      | 2.2 ± 0.2                           | 11.84 ± 0.82                                                  | 0.60 ± 0.01                                     |
| El Cepillo | San-Cep-EB-3  | 2016            | 22.0            | 3.62    | 7.6    | 3    | 12.7 ± 0.2                                      | 4.5 ± 0.1                                  | 3.69 ± 0.01         | 0.36 ± 0.06                                     | 0.2 ± 0.1   | 8.98 ± 0.69                                      | 0.61 ± 0.01                         |                                                               |                                                 |
|            |               | 2017            | 24.6            | 3.71    | 4.6    | 3    | 14.9 ± 0.2                                      | 4.7 ± 0.1                                  | 3.80 ± 0.08         | 0.58 ± 0.06                                     | 1.8 ± 0.2   | 16.30 ± 2.37                                     | 0.48 ± 0.03                         |                                                               |                                                 |
|            |               | 2018            | 24.0            | 3.58    | 4.5    | 3    | 14.2 ± 0.0                                      | 5.0 ± 0.1                                  | 3.62 ± 0.03         | 0.47 ± 0.01                                     | 2.1 ± 0.2   | 16.20 ± 0.56                                     | 0.59 ± 0.01                         |                                                               |                                                 |
| Chacayes   | Tun-Ch-MU-3   | 2016            | 23.6            | 3.60    | 6.9    | 3    | 13.5 ± 0.3                                      | 6.2 ± 0.6                                  | 3.51 ± 0.12         | 0.55 ± 0.07                                     | 0.5 ± 0.8   | 18.38 ± 1.31                                     | 0.54 ± 0.01                         |                                                               |                                                 |
|            |               | 2017            | 23.4            | 2.55    | 4.8    | 3    | 14.0 ± 0.3                                      | 5.3 ± 0.3                                  | 3.67 ± 0.01         | 0.52 ± 0.16                                     | 1.3 ± 0.2   | 19.29 ± 0.98                                     | 0.44 ± 0.01                         |                                                               |                                                 |
|            |               | 2018            | 24.4            | 3.53    | 4.3    | 3    | 14.6 ± 0.0                                      | 5.4 ± 0.1                                  | 3.53 ± 0.03         | 0.57 ± 0.04                                     | 2.7 ± 0.1   | 14.44 ± 0.22                                     | 0.59 ± 0.01                         |                                                               |                                                 |
| Uco Valley | Tunuyan       | Los Arboles     | Tun-Al-BV-5     | 2016    | 22.6   | 3.59 | 6.9                                             | 3                                          | 13.5 ± 0.2          | 5.3 ± 0.2                                       | 3.58 ± 0.03 | 0.34 ± 0.09                                      | 1.6 ± 1.6                           | 17.17 ± 0.65                                                  | 0.51 ± 0.01                                     |
|            |               |                 |                 | 2017    | 24.4   | 3.67 | 4.2                                             | 3                                          | 15.4 ± 0.8          | 5.2 ± 0.2                                       | 3.67 ± 0.03 | 0.55 ± 0.15                                      | 3.1 ± 0.5                           | 24.41 ± 1.00                                                  | 0.45 ± 0.01                                     |
|            |               |                 |                 | 2018    | 25.0   | 3.50 | 5.9                                             | 3                                          | 15.1 ± 0.3          | 6.1 ± 0.1                                       | 3.56 ± 0.01 | 0.57 ± 0.01                                      | 2.4 ± 0.1                           | 20.29 ± 0.63                                                  | 0.60 ± 0.01                                     |
|            |               | Tupungato       | Tup-Gy-AD-3-MBT | 2016    | 21.0   | 3.60 | 7.4                                             | 3                                          | 12.6 ± 0.2          | 4.9 ± 0.1                                       | 3.56 ± 0.01 | 0.25 ± 0.04                                      | 0.2 ± 0.1                           | 11.51 ± 0.50                                                  | 0.54 ± 0.2                                      |
|            |               |                 |                 | 2017    | 24.0   | 3.75 | 4.6                                             | 3                                          | 14.9 ± 0.3          | 5.6 ± 0.6                                       | 3.65 ± 0.07 | 0.49 ± 0.08                                      | 1.4 ± 0.3                           | 14.86 ± 0.81                                                  | 0.48 ± 0.01                                     |
|            |               |                 |                 | 2018    | 26.0   | 3.56 | 5.3                                             | 3                                          | 15.5 ± 0.0          | 6.5 ± 0.4                                       | 3.56 ± 0.10 | 0.60 ± 0.03                                      | 4.7 ± 0.8                           | 22.09 ± 0.79                                                  | 0.59 ± 0.01                                     |
|            | Guañallary    | Tup-Gy-AD-6-Pi  | 2016            | 24.0    | 3.45   | 5.7  | 3                                               | 13.6 ± 0.1                                 | 6.2 ± 0.1           | 3.29 ± 0.02                                     | 0.24 ± 0.02 | 0.6 ± 0.1                                        | 18.75 ± 1.95                        | 0.45 ± 0.02                                                   |                                                 |
|            |               |                 | 2017            | 24.0    | 3.45   | 5.7  | 3                                               | 14.1 ± 0.3                                 | 5.7 ± 0.1           | 3.65 ± 0.03                                     | 0.31 ± 0.04 | 1.6 ± 0.8                                        | 26.58 ± 1.82                        | 0.40 ± 0.01                                                   |                                                 |
|            |               |                 | 2018            | 25.0    | 3.62   | 6.0  | 3                                               | 14.7 ± 0.2                                 | 6.2 ± 0.3           | 3.45 ± 0.04                                     | 0.30 ± 0.03 | 1.8 ± 0.2                                        | 17.52 ± 1.14                        | 0.57 ± 0.01                                                   |                                                 |
|            |               | Tupungato       | Tup-Gy-AD-6-Pr  | 2016    | 22.6   | 3.38 | 8.0                                             | 3                                          | 13.1 ± 0.1          | 5.7 ± 0.2                                       | 3.40 ± 0.02 | 0.20 ± 0.01                                      | 0.4 ± 0.1                           | 17.18 ± 0.80                                                  | 0.46 ± 0.01                                     |
|            |               |                 |                 | 2017    | 24.0   | 3.38 | 6.3                                             | 3                                          | 14.7 ± 0.4          | 5.6 ± 0.2                                       | 3.67 ± 0.08 | 0.40 ± 0.23                                      | 1.5 ± 0.3                           | 26.59 ± 3.53                                                  | 0.42 ± 0.01                                     |
|            |               |                 |                 | 2018    | 24.0   | 3.39 | 6.6                                             | 3                                          | 13.9 ± 0.1          | 5.8 ± 0.1                                       | 3.52 ± 0.01 | 0.45 ± 0.07                                      | 1.5 ± 0.1                           | 14.00 ± 1.32                                                  | 0.57 ± 0.01                                     |
| San José   | Tup-SJ-JM-1   | 2016            | 23.0            | 3.34    | 7.6    | 3    | 13.4 ± 0.1                                      | 4.0 ± 0.1                                  | 3.55 ± 0.02         | 0.42 ± 0.02                                     | 0.2 ± 0.1   | 18.68 ± 1.59                                     | 0.46 ± 0.01                         |                                                               |                                                 |
|            |               | 2017            | 25.0            | 3.41    | 6.2    | 3    | 15.5 ± 0.2                                      | 6.6 ± 0.5                                  | 3.43 ± 0.06         | 0.29 ± 0.09                                     | 3.6 ± 1.0   | 33.18 ± 2.65                                     | 0.47 ± 0.13                         |                                                               |                                                 |
|            |               | 2018            | 25.8            | 3.34    | 6.0    | 3    | 15.1 ± 0.4                                      | 6.4 ± 0.2                                  | 3.48 ± 0.04         | 0.40 ± 0.06                                     | 4.2 ± 1.4   | 22.16 ± 3.47                                     | 0.57 ± 0.01                         |                                                               |                                                 |
|            | Tupungato     | Tup-Gy-AD-7     | 2016            | 23.0    | 3.57   | 8.6  | 2                                               | 13.9 ± 0.4                                 | 6.6 ± 0.2           | 3.29 ± 0.02                                     | 0.31 ± 0.03 | 2.5 ± 2.7                                        | 18.70 ± 1.81                        | 0.47 ± 0.01                                                   |                                                 |
|            |               |                 | 2017            | 25.0    | 3.51   | 6.5  | 3                                               | 14.9 ± 0.4                                 | 6.1 ± 0.1           | 3.51 ± 0.04                                     | 0.40 ± 0.06 | 3.4 ± 0.4                                        | 30.92 ± 0.17                        | 0.56 ± 0.05                                                   |                                                 |
|            |               |                 | 2018            | 23.6    | 3.30   | 7.5  | 3                                               | 13.5 ± 0.4                                 | 5.7 ± 0.1           | 3.50 ± 0.03                                     | 0.48 ± 0.10 | 1.7 ± 0.1                                        | 14.22 ± 1.94                        | 0.57 ± 0.01                                                   |                                                 |
| Tupungato  | Tup-Gy-AD-9   | 2016            | 23.0            | 3.37    | 7.8    | 3    | 13.4 ± 0.1                                      | 7.1 ± 0.1                                  | 3.38 ± 0.01         | 0.13 ± 0.03                                     | 0.5 ± 0.3   | 18.44 ± 0.58                                     | 0.45 ± 0.01                         |                                                               |                                                 |
|            |               | 2017            | 25.0            | 5.52    | 6.2    | 3    | 14.8 ± 0.2                                      | 5.5 ± 0.1                                  | 3.72 ± 0.09         | 0.45 ± 0.08                                     | 3.0 ± 0.2   | 23.20 ± 0.91                                     | 0.43 ± 0.01                         |                                                               |                                                 |
|            |               | 2018            | 25.4            | 3.41    | 6.6    | 3    | 14.8 ± 0.1                                      | 6.1 ± 0.1                                  | 3.49 ± 0.04         | 0.44 ± 0.05                                     | 2.0 ± 0.5   | 16.89 ± 0.74                                     | 0.57 ± 0.01                         |                                                               |                                                 |
|            | Tupungato     | Tup-Gy-GA-3     | 2016            | 21.0    | 3.34   | 9.5  | 3                                               | 11.8 ± 0.2                                 | 6.5 ± 0.1           | 3.61 ± 0.03                                     | 0.20 ± 0.05 | 0.2 ± 0.1                                        | 13.63 ± 0.71                        | 0.49 ± 0.01                                                   |                                                 |
|            |               |                 | 2017            | 24.0    | 3.51   | 6.0  | 3                                               | 13.8 ± 0.4                                 | 5.0 ± 0.2           | 3.76 ± 0.07                                     | 0.40 ± 0.08 | 2.6 ± 0.5                                        | 21.91 ± 0.67                        | 0.40 ± 0.02                                                   |                                                 |
|            |               |                 | 2018            | 23.6    | 3.28   | 7.9  | 3                                               | 14.8 ± 0.1                                 | 6.6 ± 0.1           | 3.51 ± 0.02                                     | 0.39 ± 0.03 | 2.6 ± 0.3                                        | 18.05 ± 2.73                        | 0.57 ± 0.01                                                   |                                                 |
| San José   | Tup-SJ-JM-1   | 2016            | 22.6            | 3.55    | 6.5    | 3    | 13.3 ± 0.1                                      | 5.4 ± 0.4                                  | 3.48 ± 0.07         | 0.28 ± 0.07                                     | 0.3 ± 0.1   | 12.97 ± 0.37                                     | 0.51 ± 0.01                         |                                                               |                                                 |
|            |               | 2017            | 23.0            | 3.48    | 5.1    | 3    | 13.6 ± 0.1                                      | 4.8 ± 0.1                                  | 3.65 ± 0.01         | 0.47 ± 0.05                                     | 2.4 ± 0.1   | 13.98 ± 1.13                                     | 0.42 ± 0.01                         |                                                               |                                                 |
|            |               | 2018            | 25.4            | 3.62    | 5.1    | 3    | 14.6 ± 0.1                                      | 5.4 ± 0.1                                  | 3.54 ± 0.01         | 0.55 ± 0.02                                     | 2.4 ± 0.3   | 14.66 ± 0.27                                     | 0.59 ± 0.01                         |                                                               |                                                 |
